# Unravelling the virome in birch:

## RNA-Seq reveals a complex of known and novel viruses

Artemis Rumbou <sup>1\*</sup>, Thierry Candresse <sup>2</sup>, Armelle Marais <sup>2</sup>, Laurence Svanella-Dumas <sup>2</sup>,  
Maria Landgraf <sup>1</sup>, Susanne von Bargen<sup>1</sup>, Carmen Büttner <sup>1</sup>

<sup>1</sup> Division Phytomedicine, Albrecht Daniel Thaer-Institute, Faculty of Life Sciences, Humboldt-Universität zu Berlin, Berlin, Germany

<sup>2</sup> UMR 1332, Biologie du Fruit et Pathologie, INRA, Univ. Bordeaux, CS 20032, 33882 Villenave d'Ornon, France

\*Corresponding author; email: [artemis.rumbou@agrar.hu-berlin.de](mailto:artemis.rumbou@agrar.hu-berlin.de)

### *Accession numbers*

MK402281: Cherry leaf roll virus, complete genome, RNA1

MK402282: Cherry leaf roll virus, complete genome, RNA2

MK402235: Birch idaeovirus, partial genome, RNA1

MK402236: Birch idaeovirus, partial genome, RNA2

MK402233: Birch capillovirus, partial sequence, isolate BpenGer407526\_B5

MK402234: Birch capillovirus, partial sequence, isolate BpubFinn407501\_3A

*Short title:* Birch virome by RNA-Seq

## 24 **Abstract**

25 High-throughput sequencing (HTS), combined with bioinformatics for *de novo* discovery and  
26 assembly of plant virus or viroid genome reads, has promoted the discovery of abundant novel  
27 DNA and RNA viruses and viroids. However, the elucidation of a viral population in a single plant is  
28 rarely reported. In five birch trees of German and Finnish origin exhibiting symptoms of birch leaf-  
29 roll disease (BRLD), we identified in total five viruses, among which three are novel. The number of  
30 identified virus variants in each transcriptome ranged from one to five. The novel species are  
31 genetically - fully or partially - characterized, they belong to the genera *Carlavirus*, *Idaeovirus* and  
32 *Capillovirus* and they are tentatively named *birch carlavirus*, *birch idaeovirus*, and *birch*  
33 *capillovirus*, respectively. The only virus systematically detected by HTS in symptomatic trees  
34 affected by the BRLD was the recently discovered birch leafroll-associated virus. The role of the  
35 new carlavirus in BLRD etiology seems at best weak, as it was detected only in one of three  
36 symptomatic trees. Continuing studies have to clarify the impact of the carlavirus to the BLRD. The  
37 role of the *Capillovirus* and the *Idaeovirus* within the BLRD complex and whether they influence  
38 plant vitality need to be investigated. Our study reveals the viral population in single birch trees and  
39 provides a comprehensive overview for the diversities of the viral communities they harbor.

40

41 **Keywords:** *Betula* sp., virome, birch leaf-roll disease, *birch carlavirus*, *birch idaeovirus*, *birch*  
42 *capillovirus*

## 44 Introduction

45 Symptoms in birch trees (*Betula* sp.) caused by various viruses and related to the birch  
46 leaf-roll disease (BLRD) are observed throughout Europe [1-2]. Diseased birches exhibit foliar  
47 disorders including vein banding, leaf roll, mottling, necrotic lesions and tip dieback. Based on  
48 earlier studies on virus-diseased trees it is assumed that BLRD might significantly reduce the tree's  
49 photosynthetic capacity and contribute to tree decline [3]. Due to lack of knowledge, risk analyses  
50 and prevention measures, the disease has effectively spread throughout Europe and has until now  
51 been reported in European countries with diverse climatic conditions such as Finland, Sweden,  
52 Norway, Germany, Austria, UK and France, including stands of a Mediterranean island [2-5].

53 The initial hypothesis for the BLRD disease etiology implicated *Cherry leaf roll virus* (CLRV)  
54 as the disease main causal agent [1-2; 4-5]. However, after long-lasting trials applying  
55 conventional viral detection methods (virus purification, RT-PCR, double-stranded-RNA isolation,  
56 virus mechanical transmission), this virus could not be convincingly associated with the  
57 appearance of disease symptoms. To identify BLRD etiology, a birch metagenomic study was  
58 therefore initiated. A RNA-Seq analysis revealed for the first time in diseased trees from Germany  
59 and Finland birch leafroll-associated virus (BLRaV), the first reverse-transcribing DNA virus  
60 (*Badnavirus*, *Caulimoviridae*) discovered in birches [6]. Due to the clear correlation between  
61 BLRaV presence and BLRD-related symptoms and because symptoms were reproduced after  
62 grafting healthy seedlings with scions from BLRaV-infected trees, this virus is now considered to  
63 be strongly associated with BLRD. However, apart from the novel badnavirus, the applied high-  
64 throughput sequencing (HTS) strategy enabled the characterization of the entire genetic  
65 information of the ensemble of viruses in the tested samples, providing for first time insights into  
66 the birch metavirome.

67 The wide application of HTS technologies has significantly facilitated the discovery and  
68 characterization of viral agents in trees. Several HTS-based approaches have been conducted to  
69 overcome traditional approaches, which has resulted in the identification of known and so far  
70 unknown viruses providing insight into the virome of a species. Regarding fruit trees, in the last five  
71 years HTS use has led to the discovery of many new viruses [7-12]. Similarly to the present work,

72 RNA viromes are detected in six peach trees identifying up to six viruses and viroids in each tree  
73 [13]. HTS data in nectarine provided insight to the etiology of stem pitting disease [14]. Diseased  
74 grapevine plants infected by *Grapevine Pinot gris virus* are found based on HTS data to acquire  
75 very complex viromes [15]. The total RNA-Seq approach concretely in grapevine resulted in  
76 complete virus and viroid genomes through *de-novo* assembly [16-17]. Building on this success,  
77 the movement to apply HTS for routine virus detection is gaining momentum. However, as far as  
78 challenges for the HTS for virus detection are concerned, validation should be taken into  
79 consideration and could focus on minimizing the risk of false negative results [18].

80 In the present study a first look into the birch virome is attempted. The first results on the  
81 virome of five birch trees of German and Finnish origin are described, defined as the exhaustive  
82 collection of nucleic acid sequences deriving from viral agents. A complex of known and novel  
83 viruses - including the recently discovered BLRaV - and of diverse variants of those agents was  
84 found to infect the tested samples. Apart from the already described viruses, novel species from  
85 the genera *Carlavirus*, *Idaeovirus* and *Capillovirus* are here identified and - fully or partially -  
86 genetically characterized.

87

## 88 **Materials and methods**

### 89 **RNA-Seq and sequence assembly**

90 Two twigs originating from a *Betula pubescens* donor tree (Bpub3) with severe BLRD leaf  
91 symptoms (vein banding, leaf chlorosis and necrosis, leaf rolling) from Rovaniemi (Finland) were  
92 grafted on two non-symptomatic *B. pubescens* rootstocks, generating grafted seedlings  
93 BpubFin407501\_3A and BpubFin407507\_3I. One twig originating from a *B. pendula* tree (Bpen 5)  
94 from Berlin, Germany also exhibiting BLRD symptoms was grafted on a non-symptomatic *B.*  
95 *pendula* rootstock, generating grafted seedling BpenGer407526\_5M. Two CLRV-negative and  
96 symptomless birch seedlings of respectively *B. pubescens* (BpubGerNo4) and *B. pendula*  
97 (BpenGerM0197542), obtained from the same German nursery were used as negative controls. As  
98 rootstocks for the grafting and as control trees, two-year-old sprouting birches were used (nursery  
99 Reinke GbR Baumschulen, Rellingen, Germany). The following growing season, symptoms similar

100 to the ones exhibited by the donor trees could be observed on the grafted birches already at the  
101 beginning of May and developed further until the end of September (Fig 1). No symptoms were  
102 observed on the negative, symptomless control trees.

103

104 **Fig 1. Leaf symptoms exhibited on the grafted birch seedlings BpubFin407501\_3A (A),**  
105 **BpubFin407507\_3I (B) and BpenGer407526\_5M (C).** Symptoms on seedling A (from left to right):  
106 Chlorotic vein banding, mottling, vein banding and leaf-roll. Symptoms on seedling B: mottling, leaf  
107 necrosis (final stage developed from chlorosis), vein chlorosis. Symptoms on seedling C: mottling,  
108 leaf roll and vein banding, vein banding with necrosis and leaf roll.

109

110 In 2014, pooled samples of five symptomatic leaves randomly selected from the seedlings  
111 canopy were used for RNA extraction. Similar leaf pools obtained from the symptomless trees  
112 were used in parallel. Total RNAs isolation, cDNA synthesis and preparation for RNA-Seq analysis  
113 with the Illumina HiSeq2500 system are fully described in Rumbou et al., 2018 [6]. 100 bp-long  
114 paired-end sequence reads corresponding to 50-100 Mb data/sample were generated. All HTS  
115 data processing and analysis were performed using CLC Genomics Workbench version 7.0.4.  
116 Reads were first submitted to quality filtering and trimming. The resulting cleaned reads were then  
117 assembled into contigs that were finally annotated by BlastN and BlastX against the GenBank  
118 database.

119

## 120 **Taxonomic analysis of the metagenome**

121 The taxonomic content of the obtained datasets, as provided by the Blast analyses was  
122 visualized using MEGAN [19], in which the result of the Blast analyses are parsed to assign the  
123 best hits to appropriate taxa in the NCBI taxonomy. As a result, the taxonomical content (“species  
124 profile”) of the sample from which the reads were collected was estimated, with a particular focus  
125 on viral species (Fig 2; A-E).

126

127

## 128 Validation of the presence of novel viruses in birches

129 In order to confirm the presence of the identified novel viruses, specific RT-PCR assays  
 130 were performed using virus-specific primers designed using the sequence of the scaffolds  
 131 assembled for each agent (Table 1). These primer pairs were designed using OligoCalc [20] and  
 132 respectively target regions within the RdRp domain (Carla for/rev; nt 926 – 1558) for the new  
 133 carlavirus, within the methyl transferase (MTR) domain (RNA1) for the new idaeovirus  
 134 (Idaeo\_for/rev; nt 487 – 1060) and within the coat protein domain for the new capillovirus  
 135 (Betaflexi\_for/rev; nt 95 - 552).

136

137 **Table 1. Primers used for genome completion and for the specific detection of the novel**  
 138 **viruses.**

| Primer name                   | Primer sequence (5' – 3')   | Annealing temperature | Product length (bp) |
|-------------------------------|-----------------------------|-----------------------|---------------------|
| <b>LD1_Carla_Ger526</b>       | GGATGGTAATGGCAAATCGACCT     | 62°C                  | 350                 |
| <b>LD prim</b>                | CACTGGCGGCCGCTCGAGCATGTACT  |                       |                     |
| <b>5Race1-Carla-Ger407526</b> | GAAATCATGCTCTGCTCCGTGCTGGTG | 72°C                  | 188                 |
| <b>Carla_for</b>              | CTTTGGTGCCGAATGAACGG        | 53 °C                 | 632                 |
| <b>Carla_rev</b>              | CACCGTCACCTTGGGCTATT        |                       |                     |
| <b>Idaeo_for</b>              | GAGTTCGGGTGTTCCGGTCTT       | 55 °C                 | 573                 |
| <b>Idaeo_rev</b>              | GGTGAACCGCCCAATCCTTA        |                       |                     |
| <b>Betaflexi_for</b>          | CCGGCGATAAATCACGA           | 53 °C                 | 457                 |
| <b>Betaflexi_rev</b>          | AAAGGCCGTGGAAGACATGA        |                       |                     |

139

140 Pooled samples of 3 to 5 leaves from different twigs of each tree were used. The first strand  
 141 cDNAs were synthesized from 1 µg of total RNA in a 20 µl reaction volume of 1 x RT buffer  
 142 (Thermo Scientific) containing 1 µM dNTPs mix, 200 U RevertAid Premium reverse transcriptase

143 (Thermo Scientific), 20 U Ribolock RNase inhibitor (Thermo Scientific) and 100 pmol of random  
144 hexamer-oligonucleotides (Biomers.net GmbH). Subsequent PCR amplifications were conducted  
145 in a 25  $\mu$ l volume of 1 x DreamTaq Buffer (Thermo Scientific) containing 0.2  $\mu$ M dNTP mix, 0.625  
146 U of DreamTaq DNA polymerase and 1  $\mu$ M of each forward and reverse primer (Table 1). The  
147 thermal cycles were as follows: 2 min at 95 °C followed by 35 cycles at 95 °C for 30 s,  $T_{\text{anneal}}$  for 30  
148 s, 72 °C for 40 s, with a final extension step of 72 °C for 5 min. Omitting the primers sequences,  
149 the amplified fragments are 592 nucleotides (nt) long for the carlavirus, 533 nt for the idaeovirus  
150 and 420 nt for the capillovirus. PCR products were directly submitted for Sanger sequencing  
151 (Macrogen) without previous cloning.

152

## 153 **Completion of the carlavirus genome ends**

154 Assuming a dsRNA stage of the tentative carlavirus, 5' and 3' ends of the genome were  
155 determined using a 5' Rapid amplification of cDNA-ends (5' RACE) strategy, and a polyA-anchored  
156 Long Distance-RT-PCR, respectively. The 5'RACE reaction was performed according to the kit  
157 manufacturer's instructions (Clontech / Ozyme, Saint-Quentin en Yvelines, France) (Tprimer  
158 5Race1-Carla-Ger407526; Table 1), and the 3' genome end was amplified following the protocol  
159 described by Youssef et al. [21] (primers LD1\_Carla\_Ger526 and LD prim; Table 1).

160

## 161 **Phylogenetic analyses of Carlavirus sequences**

162 Multiple nucleotide or amino acid sequence alignments were performed as well as pairwise  
163 sequence identity calculations using AliView version 1.17.1 [22]. For the phylogenetic comparisons  
164 of complete RdRp and MP regions, all identified carlavirus species represented in GenBank to date  
165 were used. Bootstrapped Maximum likelihood (ML) trees were constructed with MEGA6 [23].  
166 Robustness of nodes of the phylogenetic tree was assessed from 1,000 bootstrap resamplings,  
167 and values > 70% displayed for trees internal nodes.

168

169

170

## 171 Results

### 172 Birch metagenome taxonomic analysis with focus on the 173 virome

174 The results obtained by MEGAN analysis regarding the taxonomic content of contigs  
175 assembled from the RNA-Seq reads are shown in Fig 2 (A - E), together with the number of reads  
176 assigned to each taxon. For symptomatic sample BpenGer407526-B5, out of the 598.260 reads  
177 assessed, 561.584 belong to Eucaryota, most of them to the Phylum *Spermatophyta*, where *Betula*  
178 sp. is classified and the rest to Protista (Alveolata) and Opisthokonta (Fungi and Vertebrata) (Fig 2,  
179 C). From the 31.258 viral reads, 3.481 reads are attributed to birch leaf roll-associated virus  
180 (*Badnavirus*, *Caulimoviridae*) and specifically to two variants of this virus (see ref. 6 for detailed  
181 description). Within the single-stranded RNA viruses, 24.516 reads belong to cherry leaf roll virus  
182 (*Nepovirus*, *Secoviridae*) while 2.835 reads are analyzed as representing agent(s) in the family  
183 *Betaflexiviridae*, with affinities to helleborus net necrosis virus (2.826 reads) and apple stem  
184 grooving virus (9 reads). The presence of 426 reads from Human mastadenovirus E (dsDNA  
185 viruses) is attributed to possible contamination of the sample during sample handlings or  
186 sequencing (all 5 samples exhibit presence of this human virus).

187

188 **Fig 2. Taxonomical content of the birch samples analyzed by RNA-Seq with focus on the**  
189 **virome.** A. symptomatic birch BpubFinn407501\_3A, B. symptomatic birch BpubFinn407507\_3I, C.  
190 symptomatic birch BpenGer407526\_B5, D. symptomless birch BpubGer4 and E. symptomless  
191 birch BpenGerMO197542. Labels include taxon; number of reads assigned to taxon, summarized  
192 number of reads.

193

194 *B. pubescens* samples BpubFinn407501-3A and BpubFinn407507-3I are both found to be  
195 infected by the badnavirus BLRaV with a high number of reads (Fig 2; A and B). Furthermore, in  
196 the sample BpubFinn407501-3A, 18 reads are attributed to hobart betaflexivirus 1, an unclassified  
197 member of the *Betaflexiviridae* family, and 51 reads to Totiviruses, known to infect fungi (Fig 2; A).



198 The non-symptomatic birch seedlings are negative for all viruses present in the symptomatic ones.  
 199 However, 497 reads in the sample BpendGerMO197542 are attributed to the genus *Idaeovirus*,  
 200 with closest relatives identified as black currant leaf chlorosis-associated virus and privet leaf  
 201 blotch-associated virus (Fig 2; E).

202 An overview of the obtained RNAseq data identified in each sample is presented in Table 2.

203

204 **Table 2. Virome data generated for each birch seedling.** The number of reads and their  
 205 percentage in the sample as well as the validation output through RT-PCR (+/-) are presented.  
 206 (BLRaV: birch leafroll-associated virus; CLRV: cherry leaf roll virus; BiCV: birch carlavirus; BCV:  
 207 birch capillovirus; BIV: birch idaeovirus).

|              | Bpub Finn<br>407501_3A |        |     | Bpub Finn<br>407507_3I |        |     | BpenGer<br>407526_B5 |       |     | Bpen Ger<br>MO197542 |         |     | Bpub<br>Ger4       |         |     |
|--------------|------------------------|--------|-----|------------------------|--------|-----|----------------------|-------|-----|----------------------|---------|-----|--------------------|---------|-----|
|              | Number of<br>reads     | %      | PCR | Number of<br>reads     | %      | PCR | Number of<br>reads   | %     | PCR | Number of<br>reads   | %       | PCR | Number of<br>reads | %       | PCR |
| <b>total</b> | 803.120                |        |     | 613.923                |        |     | 725.231              |       |     | 546.722              |         |     | 682.408            |         |     |
| <b>BLRaV</b> | 3211                   | 0.4    | +   | 5567                   | 0.9    | +   | 3529                 | 0.49  | +   | 1                    | 0.0002  | -   | 1                  | 0.00015 | -   |
| <b>CLRV</b>  | 3                      | 0.0004 | +   | 3                      | 0.0005 | +   | 10896                | 1.5   | +   | 0                    | 0       | -   | 2                  | 0.0003  | -   |
| <b>BiCV</b>  | 3                      | 0.0004 | -   | 5                      | 0.0008 | -   | 2881                 | 0.397 | +   | 2                    | 0.00037 | -   | 1                  | 0.00015 | -   |
| <b>BCV</b>   | 21                     | 0.0026 | +   | 3                      | 0.0005 | +   | 20                   | 0.003 | +   | 5                    | 0.0009  | +   | 2                  | 0.00029 | +   |
| <b>BIV</b>   | 0                      | 0      | -   | 0                      | 0      | -   | 0                    | 0     | -   | 195                  | 0.036   | +   | 0                  | 0       | -   |

208

## 209 Full genome assembly of a new birch CLRV variant

210 CLRV was only detected in one of the tested symptomatic birches, the *B. pendula*  
 211 BpenGer407526\_B5 from Berlin. The full-length genome, which consists of two RNA segments,  
 212 was assembled. RNA1 is 7,848bp-long and highly similar to the birch isolate already deposited in  
 213 GenBank (LT883167, 96 % nt identity). RNA2 is 6,459bp-long and exhibits a lower level of identity  
 214 with the birch CLRV isolate (LT883166, 91 % nt identity), similar to what is observed with the  
 215 cherry CLRV isolate (JN104385, 91 % nt identity). The genomic sequences of this new CLRV  
 216 variant have been deposited in GenBank under accession numbers MK402281 (RNA1) and

217 MK402282 (RNA2).

218

## 219 **Partial genome assembly of a novel idaeovirus**

220 In the dataset from the symptomless seedling BpenGerMO197542, two long contigs of an  
221 uncharacterized virus with affinities to idaeoviruses were assembled (see Fig 2; E). The first contig  
222 is 5,232bp-long and encodes a putative protein, which in the BLAST analysis shows high level of  
223 homology with the ORF1 of the black currant leaf chlorosis associated virus (BCLCaV,  
224 YP\_009361854, 63 % aa identity) a novel, recently described idaeovirus (James and Phelan,  
225 2017). The ORF1 initiates at nt position 283-285 of the contig and codes for a 1649 aa putative  
226 replication-associated protein with conserved methyltransferase (MTR), helicase (HEL) and RNA-  
227 dependent RNA polymerase (RdRp) domains. However, the protein is not complete as a stop  
228 codon is not reached and amino acids of the Cter end of the protein are missing compared to  
229 BCLCaV. The second contig is 1,595bp-long and harbours 2 ORFs. The first ORF initiates at nt  
230 position 5-7 of the contig and ends at positions 1091-1093, and encodes a putative 362 aa-long  
231 movement protein exhibiting homologies with the corresponding protein of BCLCaV  
232 (YP\_009361835, 43% aa identity). The second ORF of the RNA2 initiates at nt positions 1090-  
233 1092, overlapping with the stop codon of the first ORF as is also observed for BCLCaV [24]. This  
234 second ORF encodes a putative coat protein (CP), which is homologous with the CP of BCLCaV  
235 (YP\_009361836, 47% aa identity), however only the first 167 aa of the protein are available, as the  
236 genome is not completely covered by the contig. The presence of this novel virus was validated by  
237 RT-PCR with specific primers (Idaeo\_for/Idaeo\_rev; Table 1) in the tested seedling. Sequencing of  
238 the amplified products provided a sequence identical with the original contig thus further confirming  
239 the infection. We suggest, therefore, that the two contigs correspond to a novel idaeovirus,  
240 tentatively named as birch idaeovirus (BIV). The obtained incomplete viral sequences were  
241 deposited in GenBank under accession numbers MK402235 (RNA1) and MK402236 (RNA2).

242 In August 2015 the symptomless seedling in which BIV was detected developed sporadic  
243 virus-like symptoms of variegation in a few leaves (Fig 3). Given the presence of the new  
244 idaeovirus in the plant, the possibility that this virus is responsible for these symptoms should be

245 further investigated.

246

247 **Fig 3. Symptoms appeared in the seedling BpenGerMO197542.**

248

## 249 **Assembly of a capillo-like virus sequence**

250 From the RNAseq dataset of the BpenGer407526\_B5 seedling a 821bp-long contig was  
251 assembled, which exhibits homologies with apple stem grooving virus (ASGV, *Betaflexiviridae*,  
252 *Capillovirus*, Fig 2; C). Further attempts to obtain longer sequences of the novel virus by means of  
253 PCR resulted in a 1114bp-long contig extending all the way to the 3'-poly(A) tail. This contig was  
254 submitted to GenBank under accession number MK402233. Within the contig, the 250 aa-long  
255 (753 nt) coat protein sequence of this novel virus (nt positions 60-812) is encoded. In the BLASTP  
256 analysis this putative protein shares low but significant identity with the CP of ASGV (AFH75121,  
257 30% identity). Furthermore, a 597bp-long sequence covering part of the same genomic region was  
258 assembled from the BpubFinn407501\_3A reads (accession number MK402234), showing 98,7%  
259 nt identity with the first one. This contig is assembled from the reads attributed to hobart  
260 betaflexivirus 1 in the Megan analysis of Fig 2; A.

261 As the encoded proteins of the new virus show less than 80% aa identity with CP  
262 sequences from other capilloviruses, they are suggested to represent a novel species of the genus  
263 *Capillovirus*. To investigate the assumption that the new virus is closely related to other  
264 capilloviruses, the phylogenetic relationships of the CP protein sequences from members of the  
265 *Betaflexiviridae* family were analyzed. In the obtained ML and NJ trees, the new virus reliably  
266 clustered within the capilloviruses clade (Fig 4). Concluding, the low amino acid identity with  
267 members of *Capillovirus* as well as the phylogeny generated for the CP regions suggest that this  
268 virus belongs to the genus *Capillovirus* and is therefore is tentatively named birch capillovirus  
269 (BCV).

270 BCV presence was confirmed by RT-PCR not only in the seedling Bpen5MGer407526\_B5  
271 from which it originated, but also in all four other seedlings analyzed here (symptomatic and not  
272 symptomatic) and in other trees from Berlin and Rovaniemi (data not shown).

273

274 **Fig 4. Phylogenetic tree reconstructed using the amino acid sequences of the CP of**  
275 ***Betaflexiviridae* members.** The tree was reconstructed using the Maximum Likelihood method  
276 and the statistical significance of branches was evaluated by bootstrap analysis (1,000 replicates).  
277 Only bootstrap values above 70% are indicated. The scale bar represents 5% amino acid  
278 divergence. Members of the Capillovirus are indicated within the rectangle. Virus abbreviations and  
279 accession numbers are as follows: apple stem grooving virus (ASGV), yacon virus A (YaVA), diuris  
280 virus A (DiVA), hobart betaflexivirus 1 (HoBFV1), currant virus A (CuVA), cherry virus A (CVA),  
281 mume virus A (MuVA), potato virus T (PVT), apricot vein clearing associated virus (AVCaV),  
282 caucasus prunus virus (CPV), mint virus 2 (MV2), grapevine virus A (GVA), actinidia virus A  
283 (AcVA), grapevine Pinot gris virus (GPGV), apple chlorotic leaf spot virus (ACLSV), cherry mottle  
284 leaf virus (CMLV), peach mosaic virus (PMV), carrot Ch virus 1 (CtChV1), lettuce Chordovirus 1  
285 (LeChV1), aconitum latent virus (AcLV), potato virus H (PVH), elderberry carlavirus E (EbCVE),  
286 birch carlavirus (BiCV), carnation latent virus (CarLV), poplar mosaic virus (PopMV), asian prunus  
287 virus 1 (APV1), rubus canadensis virus 1 (RuCV1), african oil palm ringspot virus (AOPRV), cherry  
288 green ring mottle virus (CGRMV), cherry necrotic rusty mottle virus (CNRMV), cherry rusty mottle-  
289 associated virus (CRMaV), apple stem pitting virus (ASPV), apricot latent virus (ApLV), peach  
290 chlorotic mottle virus (PCMV), grapevine stem pitting-associated virus (GRSPaV), sugarcane  
291 striate mosaic-associated virus (SSMaV), citrus leaf blotch virus (CLBV).

292

## 293 **Full genome assembly of a novel carlavirus from birch**

294 BLASTN and BLASTX annotation of the assembled contigs from symptomatic birch  
295 BpenGer407526\_B5 revealed one large contig exhibiting high BLAST scores with members of the  
296 genus *Carlavirus* (*Betaflexiviridae*) (see Fig 2; C, reads attributed by MEGAN to helleborus net  
297 necrosis virus). This 8,846 nt contig covers a near complete carlaviral genome, missing only the  
298 ends.

299 PolyA-anchored long-Distance (LD)-PCR and 5'RACE allowed the completion of the  
300 genome by generating sequences that perfectly matched the contig in the overlap regions. The

301 presence of the virus was confirmed by specific RT-PCR performed in the seedling were it was  
302 firstly detected (BpenGer407526\_B5) and in other trees in Berlin (data not shown). The full-length  
303 length genomic sequence of this novel agent was deposited in GenBank under accession number  
304 MH536506.

305 The genome of this virus is 8,896 base pairs (bp) long, which is close to the genome size of  
306 typical carlaviruses (8,3 – 8,7 kb) [25]. It shows a typical Carlavirus organization with 6 ORFs  
307 including a RNA-dependent RNA polymerase (RdRp; nt 61 – 6,084), three triple gene block  
308 proteins (TGB1; nt 6,153 – 6,857, TGB2; nt 6,835 – 7,167, TGB3; nt 7,169 – 7,381), a coat protein  
309 (CP; nt 7,432 – 8,442) and a nucleic-acids binding protein (NABP, ORF6; nt 8,442 – 8,843) (Fig 5).  
310 In the BLASTP analysis, the RdRp shows homologies with the corresponding protein of  
311 Carlaviruses, the closest being helleborus net necrosis virus (47% identity). The CP protein also  
312 shows significant levels of aa identity (41-55%) with other carlaviral CPs, the closest being  
313 elderberry carlavirus B (55% identity). The TGBs also have closest affinities to various  
314 carlaviruses: 53% identity for the TGB1 (elderberry carlavirus A), 54% for the TGB2 (poplar mosaic  
315 virus) and 71% for the TGB3 (carrot carlavirus) (Fig 4). The NABP encoded by ORF6 is closest to  
316 the corresponding protein of helleborus mosaic virus (42% identity).

317

318 **Fig 5. Schematic representation of the genome organization of the novel *Birch carlavirus***  
319 **(BiCV; Fig 5A) and *Birch idaeovirus* (BIV; Fig 5B).**

320

## 321 **Phylogenetic analysis of the novel carlavirus**

322 Phylogenetic relationships between the birch carlavirus and the sequences of carlaviruses  
323 known to date were estimated, based on amino acid sequences comparisons. The topology of the  
324 trees was similar, irrespective of whether the ML or NJ algorithms were used. Fig 6 shows a  
325 representative ML tree obtained using the RdRp and CP protein sequences. The RdRp protein  
326 from the novel carlavirus from birch clusters together with the woody host carlaviruses poplar  
327 mosaic virus (PopMV) and elderberry carlavirus A, B and D (EBCVA, EBCVB, EBCD). The CP  
328 also clusters with the elderberry carlaviruses A, B and D (EBCVA, EBCVB, EBCD) and, more

329 distantly, PopMV. The new virus is clearly only distantly related phylogenetically to all carlaviruses  
330 currently represented in the GenBank database (Fig 6), and exhibits less than 80% aa identity with  
331 the CP or RdRps of known carlaviruses. Taken together these results demonstrate that it  
332 represents a new member of the genus *Carlavirus* and it is, therefore, tentatively named birch  
333 carlavirus (BiCV).

334

335 **Fig 6. Phylogenetic trees reconstructed using the amino acid sequences of the RdRp (A)**  
336 **and the CP (B) of carlaviruses.** The tree was reconstructed using the Maximum Likelihood  
337 method and the statistical significance of branches was evaluated by bootstrap analysis (1,000  
338 replicates). Only bootstrap values above 70% are indicated. The scale bar represents 10% amino  
339 acid divergence. Virus abbreviations and accession numbers are as follows: aconitum latent virus  
340 (AcLV, NC\_002795.1), american hop latent virus (AHLV, NC\_017859.1), apple stem pitting virus  
341 (ASPV, NC\_003462.2), atractylodes mottle virus (AtrMoV, KR349343.1), birch carlavirus (BiCV),  
342 blueberry scorch virus (BIScV, NC\_003499.1), butterbur mosaic virus (ButMV, NC\_013527.1),  
343 carnation latent virus (CLV, AJ010697.1), carrot virus S (CVS, EU881919), chrysanthemum virus B  
344 (CVB, NC\_009087.2), chrysanthemum virus R (CVR, MG432107.1), coleus vein necrosis virus  
345 (CVNV, NC\_009764.1), cowpea mild mottle virus (CPMMV, NC\_014730.1), cucumber vein-  
346 clearing virus (CuVCV, JN591720.1), daphne virus S (DVS, NC\_008020.1), elderberry carlavirus A  
347 (EBCVA, NC\_029085.1), elderberry carlavirus B (EBCVB, NC\_029086.1), elderberry carlavirus C  
348 (EBCVC, NC\_029087.1), elderberry carlavirus D (EBCVD, NC\_029088.1), elderberry carlavirus E  
349 (EBCVE, NC\_029089.1), gaillardia latent virus (GLV, NC\_023892.1), garlic common latent virus  
350 (GarCLV, NC\_016440.1), helenium virus S (HeIVS, D10454.1), helleborus mosaic virus (HeMV,  
351 FJ196838.1), helleborus net necrosis virus (HeNNV, NC\_012038.1) hippeastrum latent virus  
352 (HiLV, NC\_011540.1), hop latent virus (HpLV, NC\_002552.1); hop mosaic virus (HpMV,  
353 NC\_010538.1), hydrangea chlorotic mottle virus (HCMV, NC\_012869.1), jasmine virus C (JaVC,  
354 NC\_030926.1), kalanchoe latent virus (KLV, NC\_013006.1), ligustrum necrotic ringspot virus  
355 (LiNRSV, NC\_010305.1), ligustrum virus A (LVA, NC\_031089.1), lily symptomless virus (LSV,  
356 NC\_005138.1), melon yellowing-associated virus (MYaV, LC224308.1), mirabilis jalapa mottle  
357 virus (MJMV, NC\_016080.1) narcissus common latent virus (NCLV, NC\_008266.1), narcissus

358 symptomless virus (NSV, NC\_008552.1), nerine latent virus (NeLV, NC\_028111.1), passiflora  
359 latent virus (PLV, NC\_008292.1), pea streak virus (PeSV, NC\_027527.1), pepper virus A (PVA,  
360 NC\_034376.1), phlox virus B (PhVB, NC\_009991.1), phlox virus M (PhVM, FJ159381.1), phlox  
361 virus S (PhVS, NC\_009383.1), poplar mosaic virus (PopMV, NC\_005343.1), potato latent virus  
362 (PoLV, NC\_011525.1), potato virus H (PVH, NC\_018175.1), potato virus M (PVM, NC\_001361.2),  
363 potato virus S (PVS, NC\_007289.1), potato rough dwarf virus (PRDV, NC\_009759.1), red clover  
364 vein mosaic virus (RCVMV, NC\_012210.1), shallot latent virus (SLV, NC\_003557.1), sweet potato  
365 chlorotic fleck virus (SPCFV, NC\_006550.1), sweet potato virus (SPV, NC\_018448.1), yam latent  
366 virus (YLV, NC\_026248.1).

367

## 368 Discussion

369 The first results of the birch virome characterization presented here occurred after long-  
370 term trials aiming to define the causal agent of the “birch leaf-roll disease” which seriously affects  
371 birch forests and urban greens throughout Europe. As expected, the development of an HTS  
372 strategy succeeded in offering information about the entire virome of the analysed trees. In the  
373 case of the symptomatic *B. pendula* sample, the virome comprises five viral agents, namely a new  
374 isolate from the well-characterized CLRV nepovirus, two variants of the recently discovered birch  
375 leafroll-associated badnavirus (BLRaV), an isolate of the newly discovered birch carlavirus, as well  
376 as a partial sequence of the novel birch capillovirus (BCV) (Fig 2; C). In the case of the  
377 symptomatic *B. pubescens* seedlings, the virome is less complex; in BpubFinn407501-3A a BLRaV  
378 and a BCV infection were detected (Fig 2; A), while in BpubFinn407507\_3I a single BLRaV-  
379 infection was detected (Fig 2; B). In earlier studies, both *B. pubescens* seedlings were tested  
380 CLRV-positive in RT-PCR assays [2]. However, CLRV was not detectable in the samples at the  
381 time of the season when the RNA-Seq was performed. This is not surprising according to our  
382 experience, because the low CLRV titers in Finnish birches often lead to false negatives when  
383 performing diagnostic RT-PCRs [2].

384 The virome of these three symptomatic birch seedlings analysed by RNA-Seq allows a new  
385 interpretation concerning the BLRD etiology. BLRaV should be considered as the main agent

386 directly related with the symptoms, because it is the only virus systematically detected by HTS in  
387 symptomatic trees and because it was absent from symptomless ones. Concretely, in the case of  
388 BpubFinn407507\_3I, it is the only virus with significant number of reads, which tends to  
389 demonstrate its causal role. Concerning BIV, it was detected in a symptomless tree, it is therefore,  
390 possible that this virus is latent. The other novel virus, BiCV, is detected in only one from the three  
391 symptomatic trees, suggesting that most probably it is not needed for BLRD development. BCV  
392 was detected in symptomatic and non-symptomatic trees and is thus most possibly a latent virus,  
393 although it could still possibly contribute to pathogeny through interactions with other agents.

394 The complexity of viromes observed in the tested birch seedlings has been lately observed  
395 in other birches in Berlin. In an investigation of viruses' distribution in urban parks in Berlin for two  
396 consecutive years, BiCV was present in 16% of the tested birches [26]. In five from these trees a  
397 co-infection of BiCV, CLRV and the BLRaV badnavirus was found (data not shown). Co-infection  
398 with BiCV, CLRV, ApMV (*Apple mosaic virus*) and BLRaV in birches was observed in urban green  
399 of Berlin with an incidence in symptomatic leaves of around 29 % within three years of  
400 investigation. These data indicate that mixed infections in birch are widespread A correlation of this  
401 viral complex with specific symptom appearance and differentiation of symptomatology in cases of  
402 infection by a single virus or by two virus species is not easy to establish [27]. In contrast to annual  
403 plants, in a large-volume birch tree the symptomatology may differ in different parts of the canopy  
404 and this may be related to differentiation of the virus population – as recently demonstrated in  
405 birches [2] - or to other parameters.

406 Under the light of a holistic understanding of the disease pathogenesis the “pathobiome”  
407 concept has been developed, which represents the pathogenic agent integrated within its biotic  
408 environment [28]. Understanding the pathobiome thus requires (1) an accurate knowledge of the  
409 microorganism community, (2) clear evidence of any effect(s) this microorganism community has  
410 on pathogenesis, (3) an understanding of the impact of the microorganism community on  
411 persistence, transmission and evolution of pathogenic agents, and (4) knowledge of biotic and  
412 abiotic factors that may disrupt the pathobiome and lead to onset of pathogenesis. According to  
413 this concept the diverse viruses detected in birches in the present study may play a direct or  
414 indirect role in disease development, as each virus may interact with or disturb the virome,



415 ultimately causing a disease [22].

416         Apart from the virome extensively described here, attention should be also given to the rest  
417 of microorganisms detected in the samples. Bacterial species (*Proteobacteria*, *Terrabacteria*, FCB  
418 Group bacteria), unclassified Totiviruses as well as thousands of unassigned reads are part of the  
419 birch metagenome. Our findings should be examined under the holistic view of the “hologenome  
420 theory” [29], which proposes that plants must not be viewed as autonomous entities but rather as  
421 holobionts, within which all interacting organisms contribute to the overall stability of the system  
422 [30]. Driving factors as microbiota in the soil, the rhizosphere, the rhizoplane, the endosphere and  
423 the aboveground compartment play significant role in the health status of the holobiont [31]. With  
424 our study we provide some new data regarding the birch microbiote complexity. Their role is not  
425 analysed in the present study, but it may be combined with further data in the future.

426         Concerning the new capillovirus BCV, given the short length of the genomic region  
427 characterized, there are still some doubts whether the detected sequences indeed represent an  
428 existing virus and, if so, whether this virus can unambiguously be assigned to the Capillovirus  
429 genus. This can only be sorted out, ultimately, by efforts to obtain the full genome of the suspected  
430 virus. It is noteworthy, that a 600-nt sequence with very high homology with the newly discovered  
431 contig has been identified within the transcriptomic data generated from pollen of *Betula verrucosa*  
432 [32], indicating that if indeed the sequence identified here is viral, the agent might be more broadly  
433 present in other *Betula* species.

434         To our knowledge, it is the first time that metagenome data of a forest tree species (*Betula*  
435 *sp.*) are reported. In comparison to cultivated plants, little steps are done regarding knowledge on  
436 viruses present in forest ecosystems. Missing data or unawareness concerning viral incidence in  
437 forests may lead to unjustified disease diagnosis and determination of the causal agent. Not only  
438 birch suffers from viral diseases. Virus-like symptoms are commonly observed in *Fraxinus sp.*  
439 (Central Europe, Switzerland, Germany), in *Quercus sp.* (Germany, Sweden, Romania), in *Ulmus*  
440 *sp.* (Germany, Sweden, Gotland), in *Acer sp.* (Germany), in *Populus sp.* (Germany, Finland), in  
441 *Ulmus sp.* (Germany), and in *Sorbus sp.* (Germany, North and Central Europe) [2]. Based on our  
442 extended experience on recognising symptomatology of viral causal agents and on monitoring  
443 distribution of viral diseases, we suggest that viral infections alter plant predisposition and do have

444 an impact on the disease status of many forest and urban trees. HTS technologies may offer a  
445 deeper investigation of the viruses in forest species and fill in the knowledge gap concerning the  
446 virome of a forest. Current [33] and future investigations are expected to enlighten interacting  
447 potential of viruses with influencing abiotic and biotic factors in forest and urban trees as well as  
448 the mode of virus transmission.

449

## 450 **References**

- 451 1. Jalkanen R, Büttner C, von Bargaen S. *Cherry leaf roll virus* abundant on *Betula pubescens*  
452 in Finland. *Silva Fennica* 2007;41: 755–762.
- 453 2. Rumbou A, von Bargaen S, Demiral R, Langer J, Rott M, Jalkanen R, et al. High genetic  
454 diversity at the inter-/intra-host level of *Cherry leaf roll virus* population associated with the  
455 birch leaf-roll disease in Fennoscandia. *Scand J For Res*, 2016;31(6): 546-560.
- 456 3. Büttner C, von Bargaen S, Bandte M, Mühlbach HP. Forests diseases caused by viruses. In:  
457 Infectious forest diseases. APS Press, 2013 ISBN: 9781780640402. p. 97–110.
- 458 4. Langer J, Rumbou A, Fauter A, von Bargaen S, Büttner C. High genetic variation in a small  
459 population of *Cherry leaf roll virus* in *Betula* sp., of montane origin in Corsica. *For Pathol.*  
460 2016;46(6): 595-599. doi:10.1111/efp.12276.
- 461 5. von Bargaen S, Grubits E, Jalkanen, Büttner C. *Cherry leaf roll virus* – an emerging virus in  
462 Finland? *Silva Fennica* 2009;43: 727–738.
- 463 6. Rumbou A, Candresse T, Marais A, Theil S, Langer J, Jalkanen R, et al. A novel  
464 badnavirus discovered from *Betula* sp. affected by birch leaf-roll disease. *PLoS ONE* 2018;  
465 13(3): e0193888.
- 466 7. Adams IP, Glover RH, Monger WA, Mumford R, Jackeviciene E, Navalinskiene M, et al.  
467 Next-generation sequencing and metagenomic analysis: a universal diagnostic tool in plant  
468 virology. *Mol Plant Pathol.* 2009;10: 537–545. doi:10.1111/j.1364-3703.2009.00545.x.
- 469 8. Massart S, Olmos A, Jijakli H, Candresse T. Current impact and future directions of high  
470 throughput sequencing in plant virus diagnostics. *Vir Research* 2014;188: 90-96.

- 471 9. Massart S, Candresse T, Gil J, Lacomme C, Predajna L, Ravnikar M, et al. A Framework  
472 for the Evaluation of Biosecurity, Commercial, Regulatory and Scientific Impacts of Plant  
473 Viruses and Viroids Identified by NGS Technologies. *Front Microbiol.* 2017;8:45.  
474 doi:10.3389/fmicb.2017.00045.
- 475 10. Wu Q, Ding SW, Zhang Y, Zhu S. Identification of viruses and viroids by next-generation  
476 sequencing and homology-dependent and homology-independent algorithms. *Annu Rev*  
477 *Phytopathol.* 2015;53,: 425–444. doi: 10.1146/annurev-phyto-080614-120030.
- 478 11. Roossinck MJ, Martin DP, Roumagnac P. Plant virus metagenomics: advances in virus  
479 discovery. *Phytopathology* 2015;105: 716–727. doi: 10.1094/PHYTO-12-14-0356-RVW.
- 480 12. Maree HJ, Fox A, Rwahnih M Al, Boonham N. Application of HTS for Routine Plant Virus  
481 Diagnostics: State of the Art and Challenges. *Front. Plant Science* 2018;9: 1–4.  
482 doi:10.3389/fpls.2018.01082
- 483 13. Jo Y, Lian S, Chu H, Cho JK, Yoo S, Choi H, et al. Peach RNA viromes in six different  
484 peach cultivars. *Sci Rep. Springer US*; 2018; 1–14. doi:10.1038/s41598-018-20256-w.
- 485 14. Villamor DEV, Mekuria TA, Pillai, SS, Eastwell K. High throughput sequencing identifies  
486 novel viruses in nectarine: Insights to the etiology of stem pitting disease. *Phytopathology*  
487 2016;106, 519–527.
- 488 15. Beuve M, Hily JM, Alliaume A, Reinbold C, Le Maguet J, Candresse T, et al. A complex  
489 virome unveiled by deep sequencing analysis of RNAs from a French Pinot Noir grapevine  
490 exhibiting strong leafroll symptoms. *Arch. Virol.* 2018; doi: 10.1007/s00705-018-3949-9.
- 491 16. Coetzee BM, Freeborough J, Maree HJJ, Celton M, Rees JG, Burger JT. Deep sequencing  
492 analysis of viruses infecting grapevines: virome of a vineyard. *Virology* 2010;400, 157–163.  
493 doi: 10.1016/j.virol.2010. 01.023
- 494 17. Hily JM, Candresse T, Garcia S, Vigne E, Tannièrè M, Komar V, et al. High-Throughput  
495 Sequencing and the Viromic Study of Grapevine Leaves: From the Detection of Grapevine-  
496 Infecting Viruses to the Description of a New Environmental Tymovirales Member. *Front.*  
497 *Microbiol.* 2018;9:1782. doi: 10.3389/fmicb.2018.01782
- 498 18. Roenhorst JW, Krom C, de Fox A, Mehle N, Ravnikar M, and Werkman AW. Ensuring  
499 validation in diagnostic testing is fit for purpose: a view from the plant virology laboratory.

- 500 EPPO Bull. 2018: 48, 105–115. doi: 10.1111/epp.12445.
- 501 19. Huson DH, Beier S, Flade I, Górska A, El-Hadidi M, Mitra S, et al. MEGAN Community  
502 Edition - Interactive Exploration and Analysis of Large-Scale Microbiome Sequencing Data.  
503 PLoS Comput Biol. 2016;12(6): e1004957. <https://doi.org/10.1371/journal.pcbi.1004957>
- 504 20. Kibbe WA. 'OligoCalc: an online oligonucleotide properties calculator'. Nucleic Acids Res.  
505 2007;35 (webserver issue): May 25.
- 506 21. Youssef F, Marais A, Faure C, Gentit P, Candresse T. Strategies to facilitate the  
507 development of uncloned or cloned infectious full-length viral cDNAs: Apple chlorotic leaf  
508 spot virus as a case study. Virol J. 2011;8:488. doi: 10.1186/1743-422X-8-488.
- 509 22. Larsson A; AliView: a fast and lightweight alignment viewer and editor for large datasets,  
510 Bioinformatics 2014;30(22): 3276–3278 <https://doi.org/10.1093/bioinformatics/btu531>
- 511 23. Tamura K, Stecher G, Peterson D, Filipski A, Kumar S. MEGA6: Molecular Evolutionary  
512 Genetics Analysis version 6.0. Molecular Biology and Evolution 2013;30: 2725-2729.
- 513 24. Thekke-veetil T, Ho T. Characterization and detection of a novel ideovirus infecting  
514 blackcurrant. Eur J Plant Pathol 2017; doi:10.1007/s10658-017-1211-z
- 515 25. International Committee on Taxonomy of Viruses (ICTV). Virus Taxonomy: 2016 Release.  
516 Available from: [https://talk.ictvonline.org/ictv-reports/ictv\\_9th\\_report](https://talk.ictvonline.org/ictv-reports/ictv_9th_report) (August 2016); p 924.
- 517 26. Landgraf M, Gehlsen J, Rumbou A, Bandte M, von Bargaen S, Schreiner M, et al.  
518 Absterbende Birken im urbanen Grün Berlins – eine Studie zur Virusinfektion. In:  
519 Dujesiefken, D. (Ed.), Jahrbuch der Baumpflege 2016, Haymarket Media, Braunschweig,  
520 276-283.
- 521 27. Opoku EB, Landgraf M, Pack K, Bandte M, von Bargaen S, Schreiner M, Jäckel B, Büttner  
522 C. Emerging viruses in urban green- detection of the virome in birch (*Betula* sp.), J  
523 Horticulture, Biological Sciences 2018;5:2 DOI: 10.4172/2376-0354.1000233
- 524 28. Vayssier-Taussat M, Albina E, Citti CJ, Cosson FM., Jacques AM, Candresse T. Shifting  
525 the paradigm from pathogens to pathobiome: new concepts in the light of metaomics.  
526 Front. Cell. Infect. Microbiol. 2014;4:29. doi: 10.3389/fcimb.2014.00029.

- 527 29. Rosenberg E, Zilber-Rosenberg I. The hologenome concept: Human, animal and plant  
528 microbiota. *The Hologenome Concept: Human, Animal and Plant Microbiota*. 2013.  
529 doi:10.1007/978-3-319-04241-1.
- 530 30. Vandenkoornhuyse P, Quaiser A, Duhamel M, Le Van A, Dufresne A. The importance of  
531 the microbiome of the plant holobiont. *New Phytol.* 2015;206: 1196–1206.  
532 doi:10.1111/nph.13312 1.
- 533 [31.](#) Hacquard S. Disentangling the factors shaping microbiota composition across the plant  
534 holobiont. *New Phytol.* 2016;209: 454–457. doi:10.1111/nph.13760
- 535 [32.](#) Mckenna OE, Posselt G, Gadermaier G, Wessler S. Multi-Approach Analysis for the  
536 Identification of Proteases within Birch Pollen. 2017; doi:10.3390/ijms18071433.
- 537 [34-33.](#) Landgraf, M., Langer, J., Gröhner, J., Zinnert, L., Bandte, M., von Bargen, S.,  
538 Schreiner, M., Jäckel, B., Büttner, C., 2017: Viruserkrankungen im urbanen Grün – eine  
539 Studie an Birken im Berliner Bezirk Steglitz-Zehlendorf Viral diseases in urban areas – a  
540 study on birch in Berlin Steglitz-Zehlendorf Jahrbuch der Baumpflege, 21. Jg., S. 327–332,  
541 ISBN 978-3-87815-253-8
- 542

## 543 Acknowledgments

544 This work is partly accomplished in the frame of the COST Action FA1407 with the title ‘Application  
545 of next generation sequencing for the study and diagnosis of plant viral diseases in agriculture’.  
546 Moreover, we appreciate DFG (Deutsch Forschungsgessellschaft) for funding the projects  
547 BU890/14-1 (“Modes of transmission of *Cherry leaf roll virus*”) and BU890/23-1 (“Modes of vector  
548 transmission of CLRV – molecular basis and potential arthropod vector species”), through which  
549 the scientific basis for accomplishing the given study was built.

550

## 551 Supporting information

552 **Fig 7. Phylogenetic trees reconstructed using the amino acid sequences of the proteins**  
553 **encoded by the TGBP1 (A), the TGBP2 (B), the TGBP3 and the ORF6 of carlaviruses.** The  
554 trees were reconstructed using the Maximum Likelihood method and the statistical significance of

555 branches was evaluated by bootstrap analysis (1,000 replicates). Only bootstrap values above  
556 70% are indicated. The scale bar represents 10% amino acid divergence.

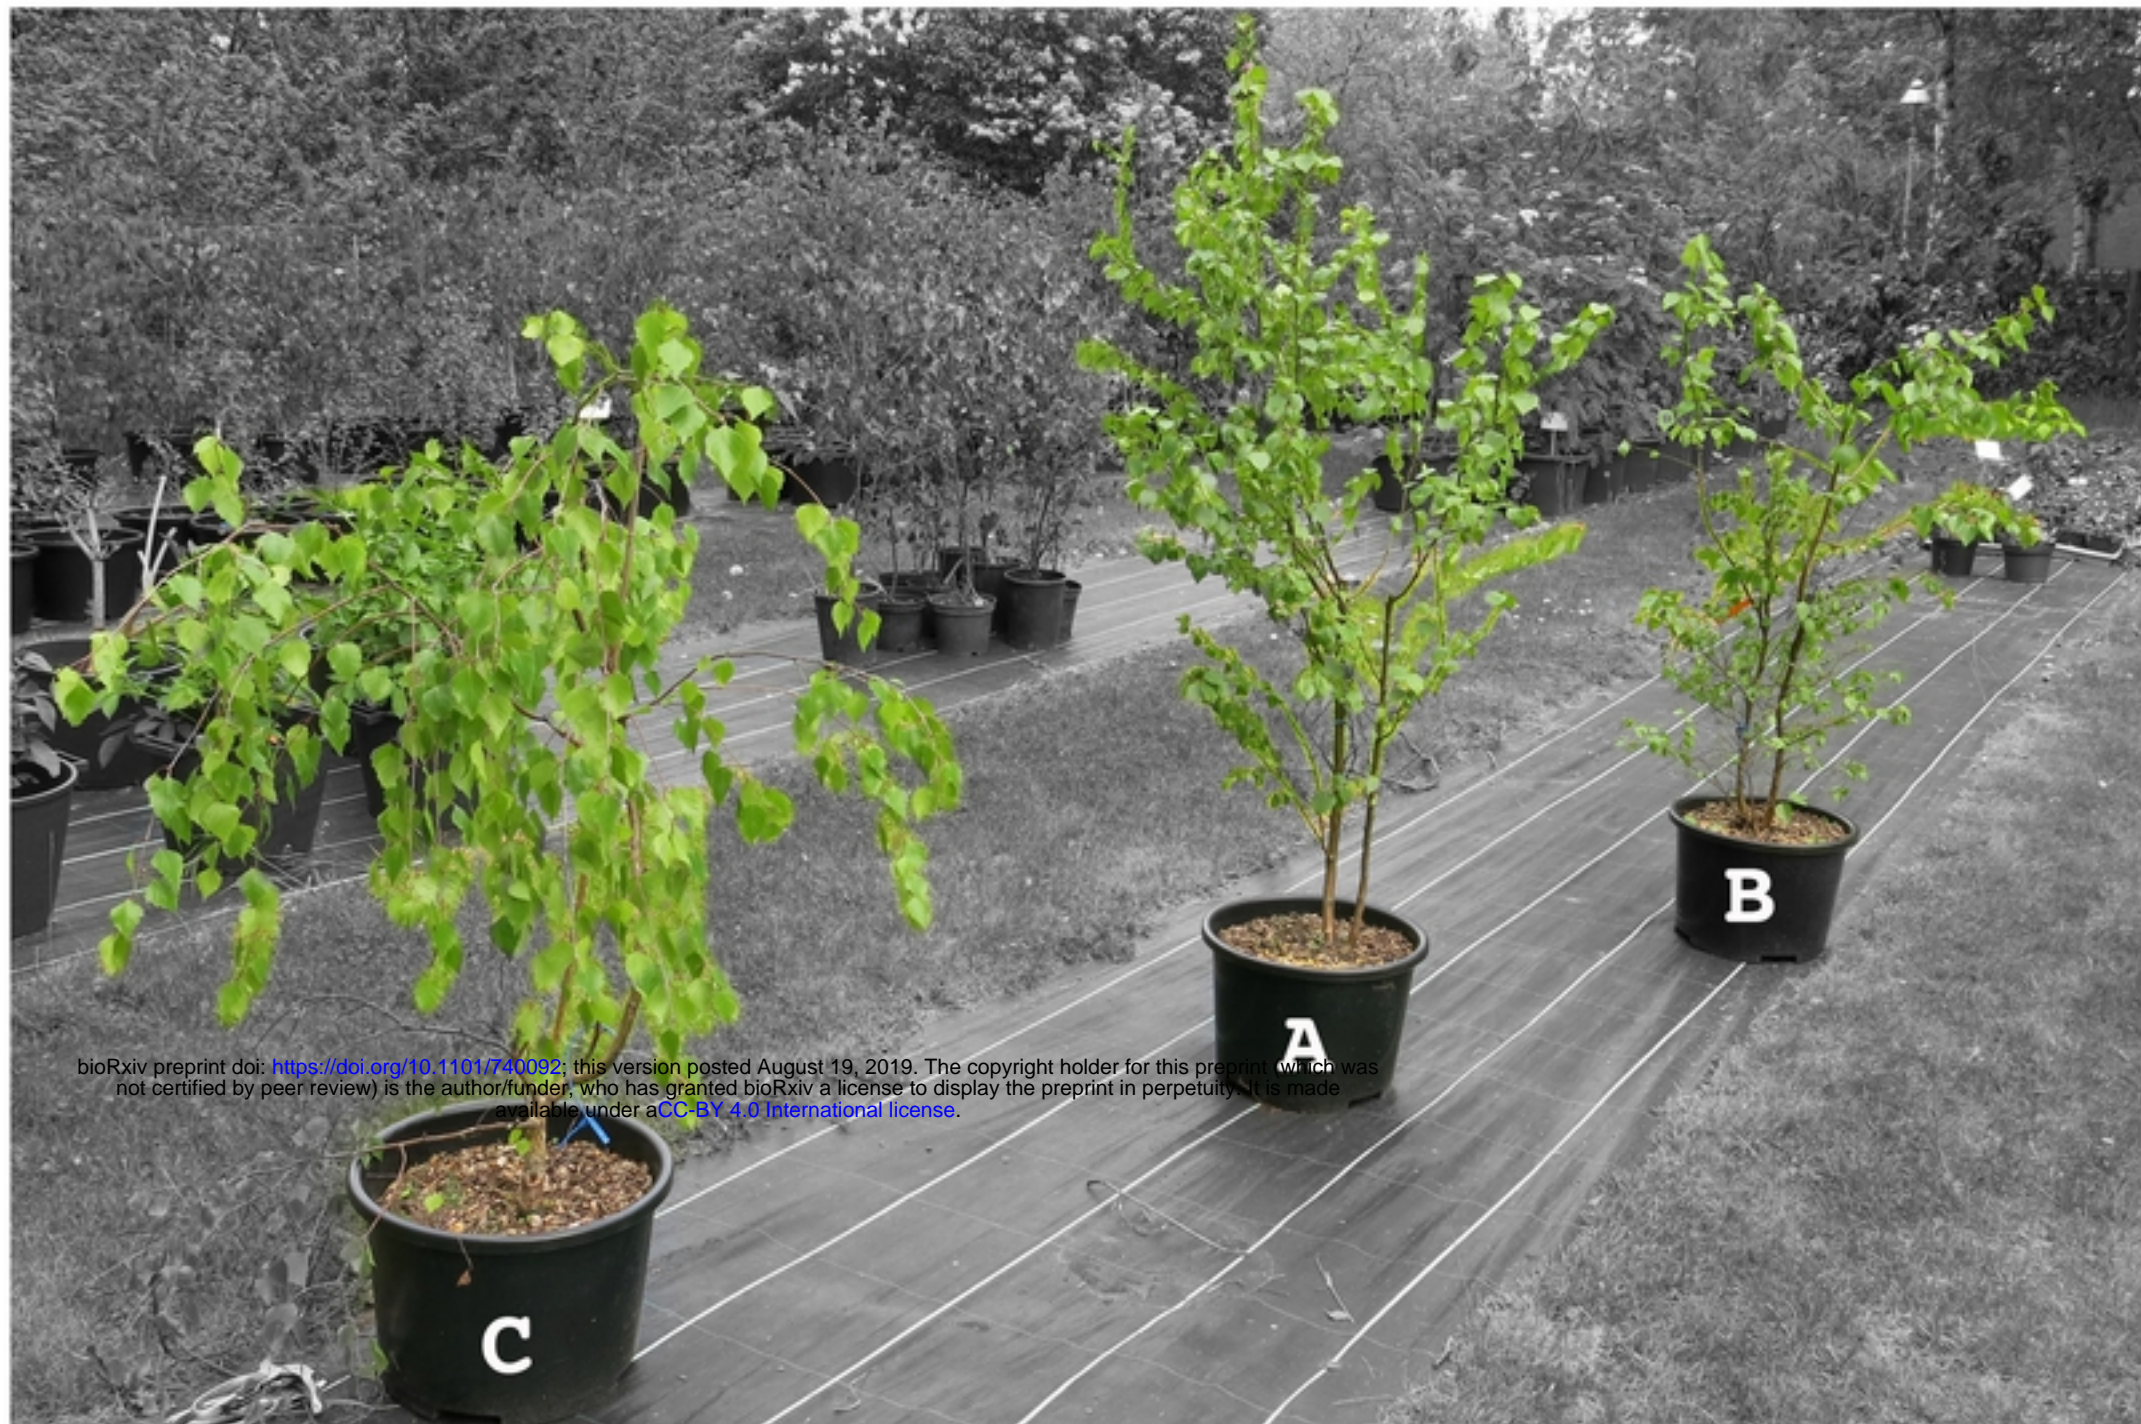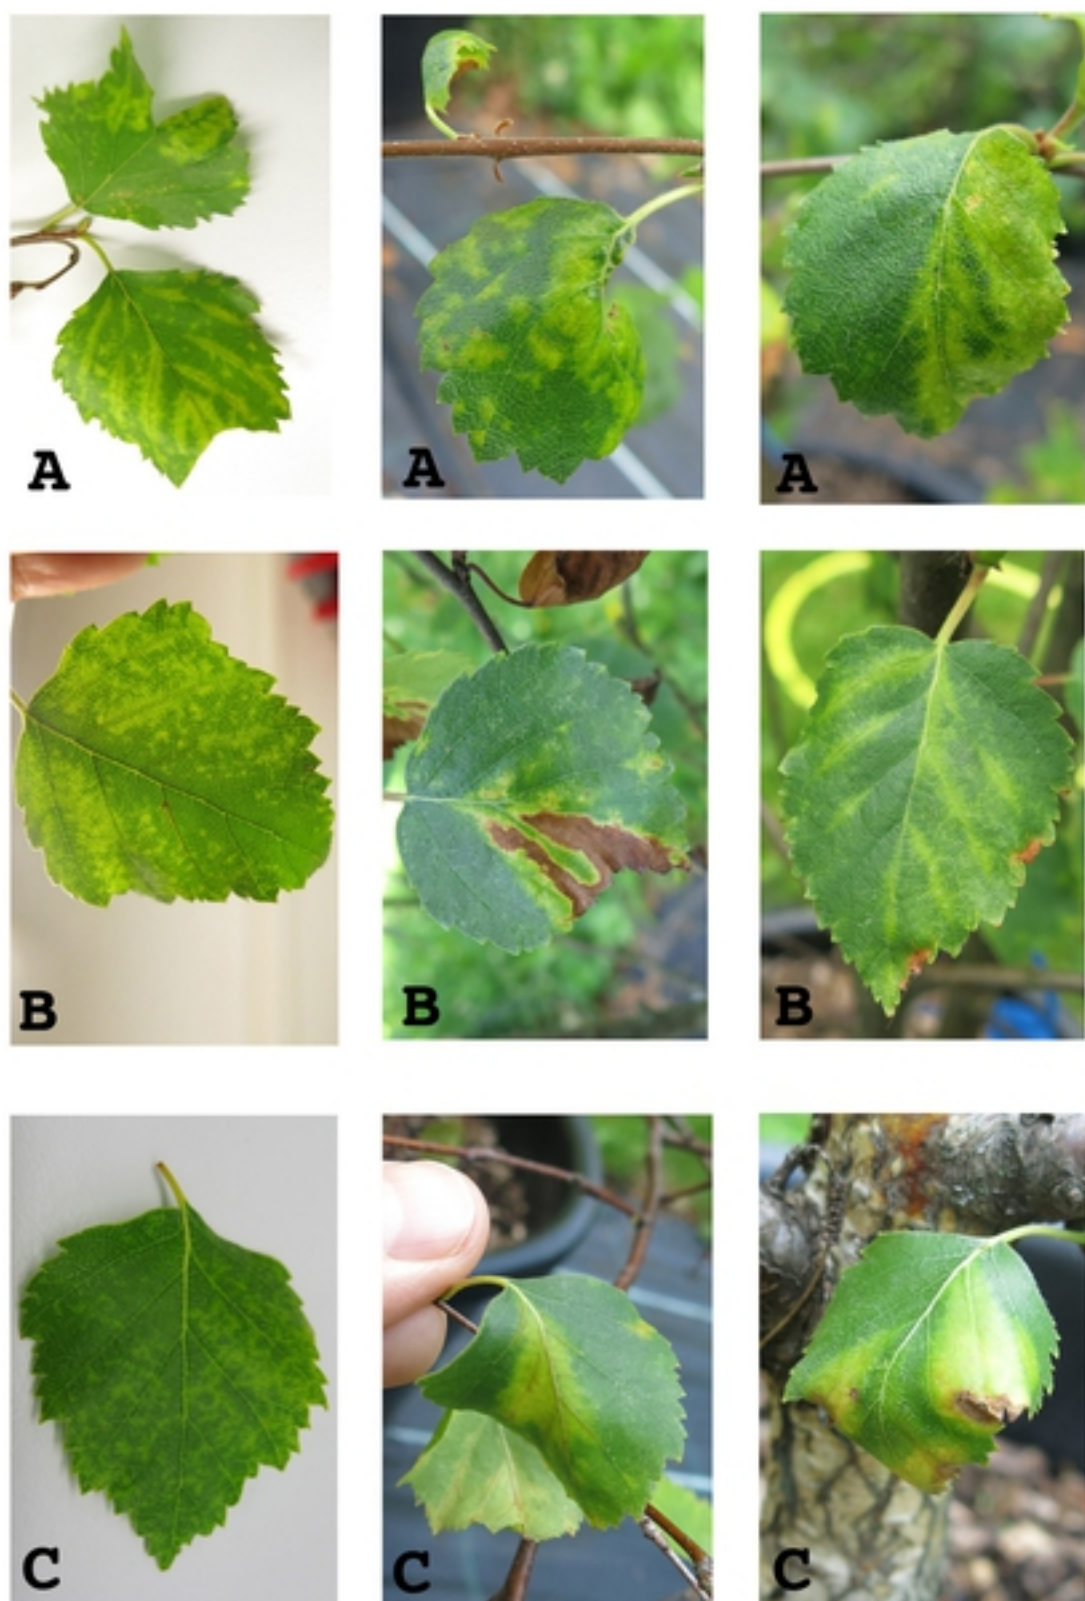

Figure 1

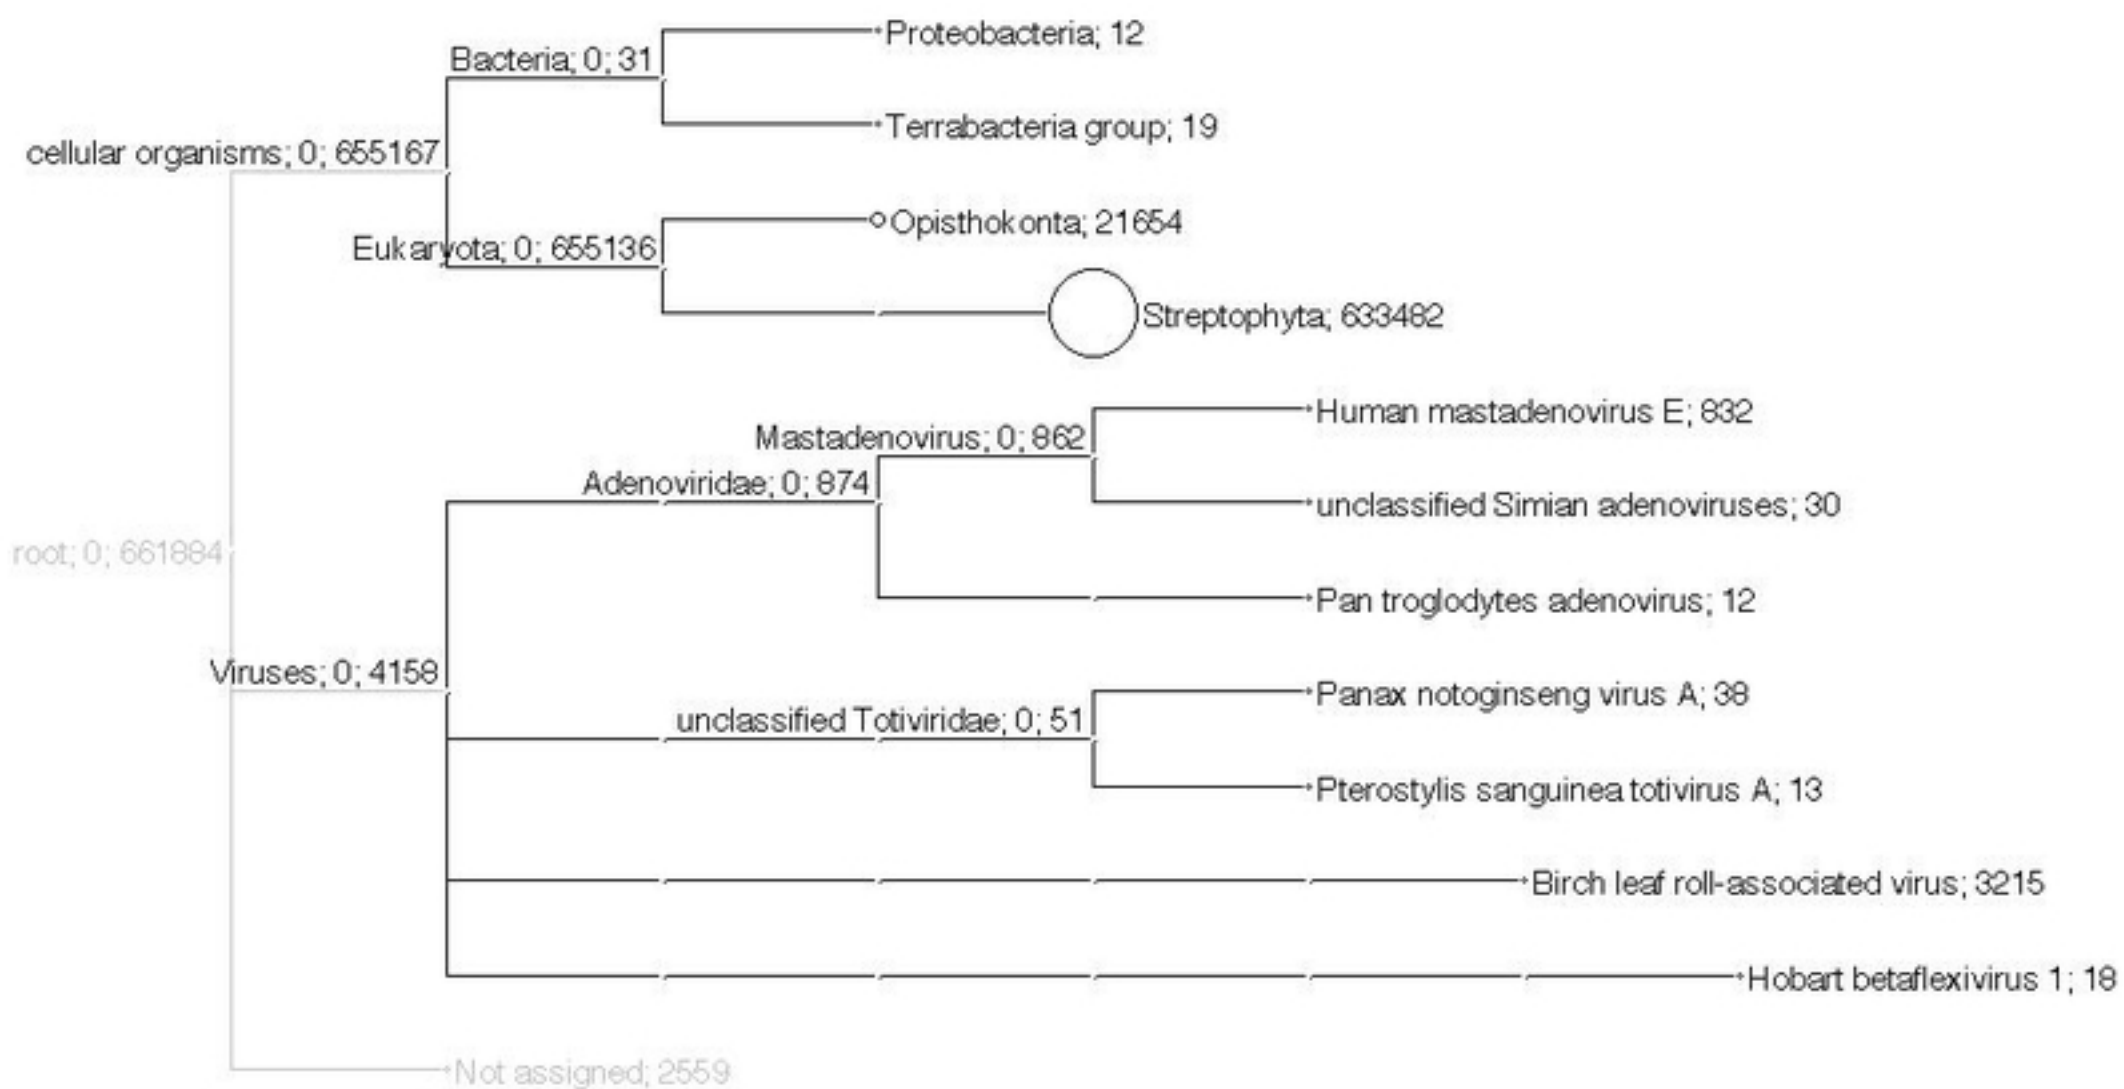

Figure 2



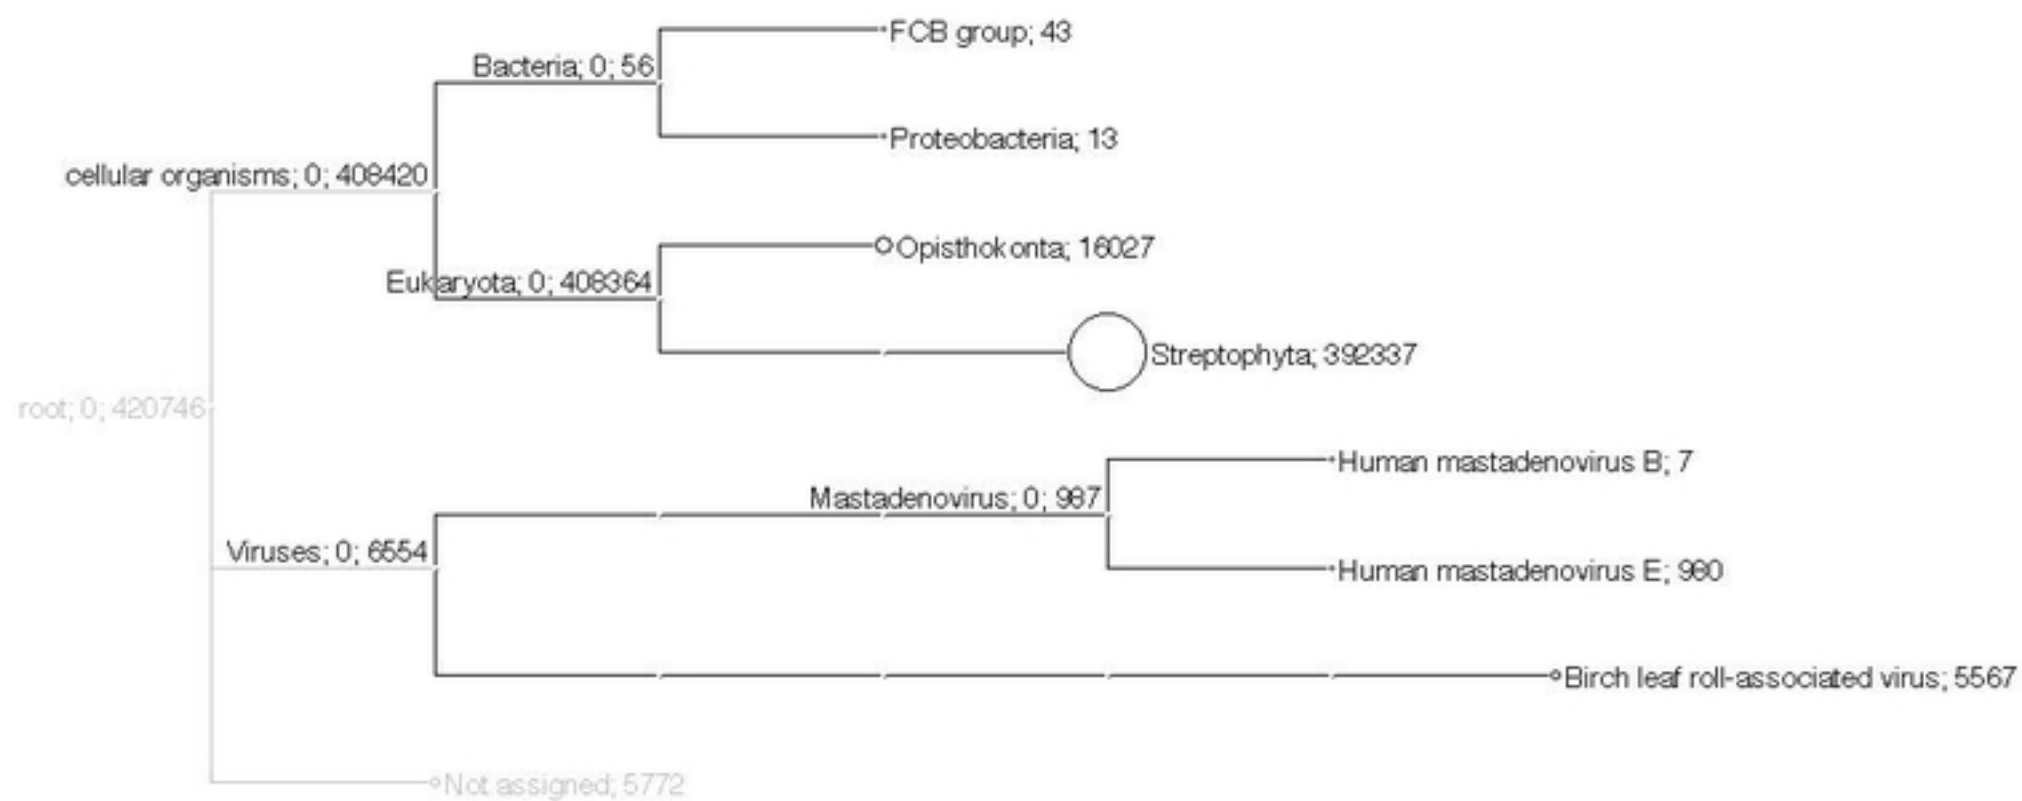

Figure 2

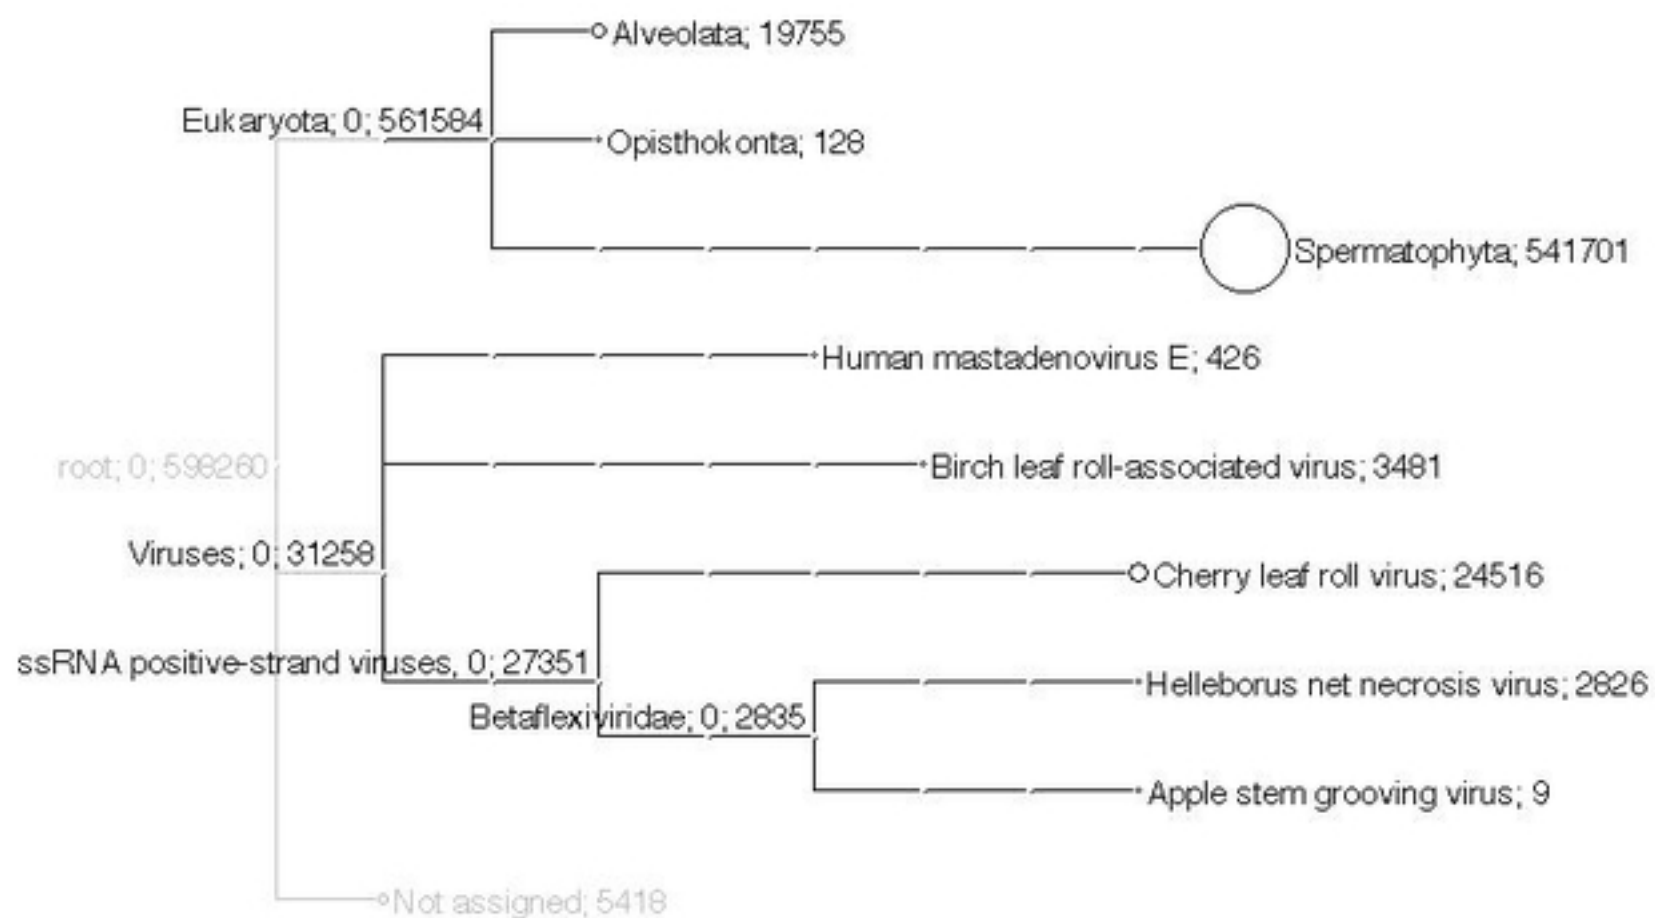

Figure 2

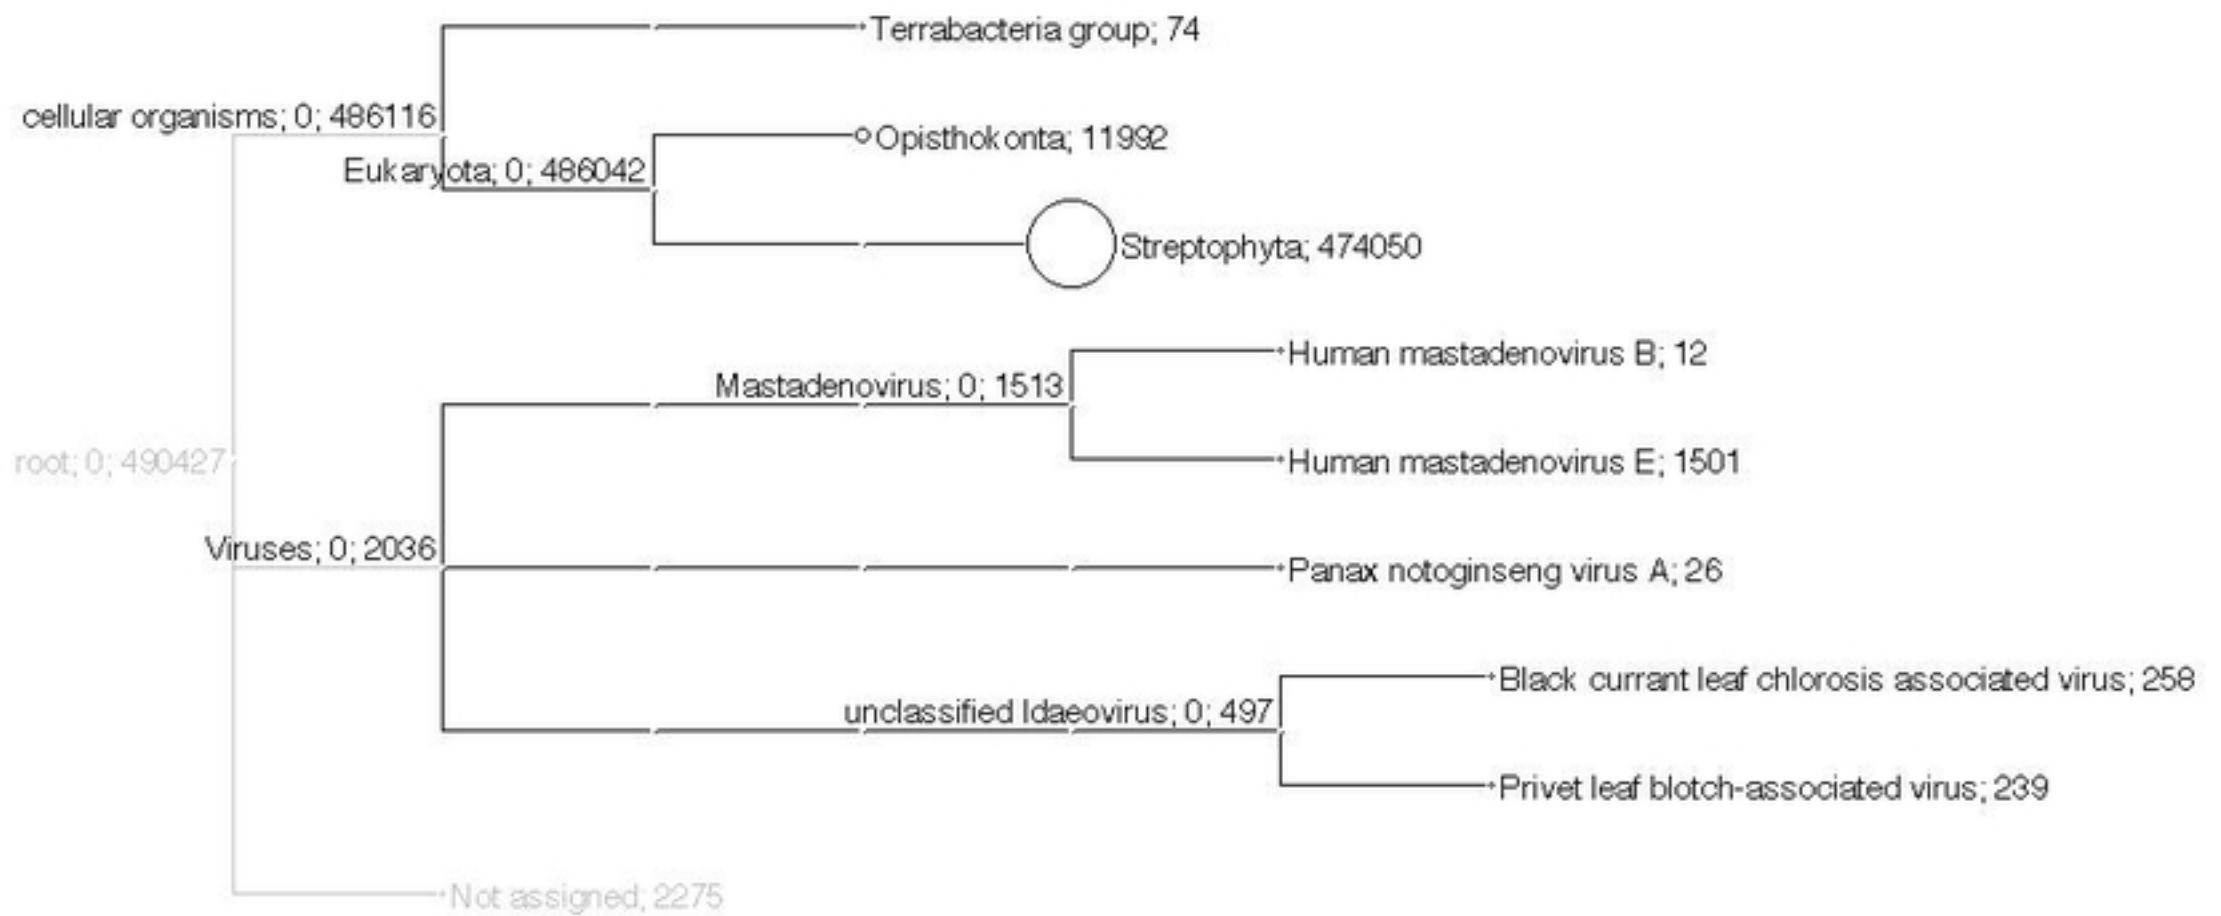

Figure 2

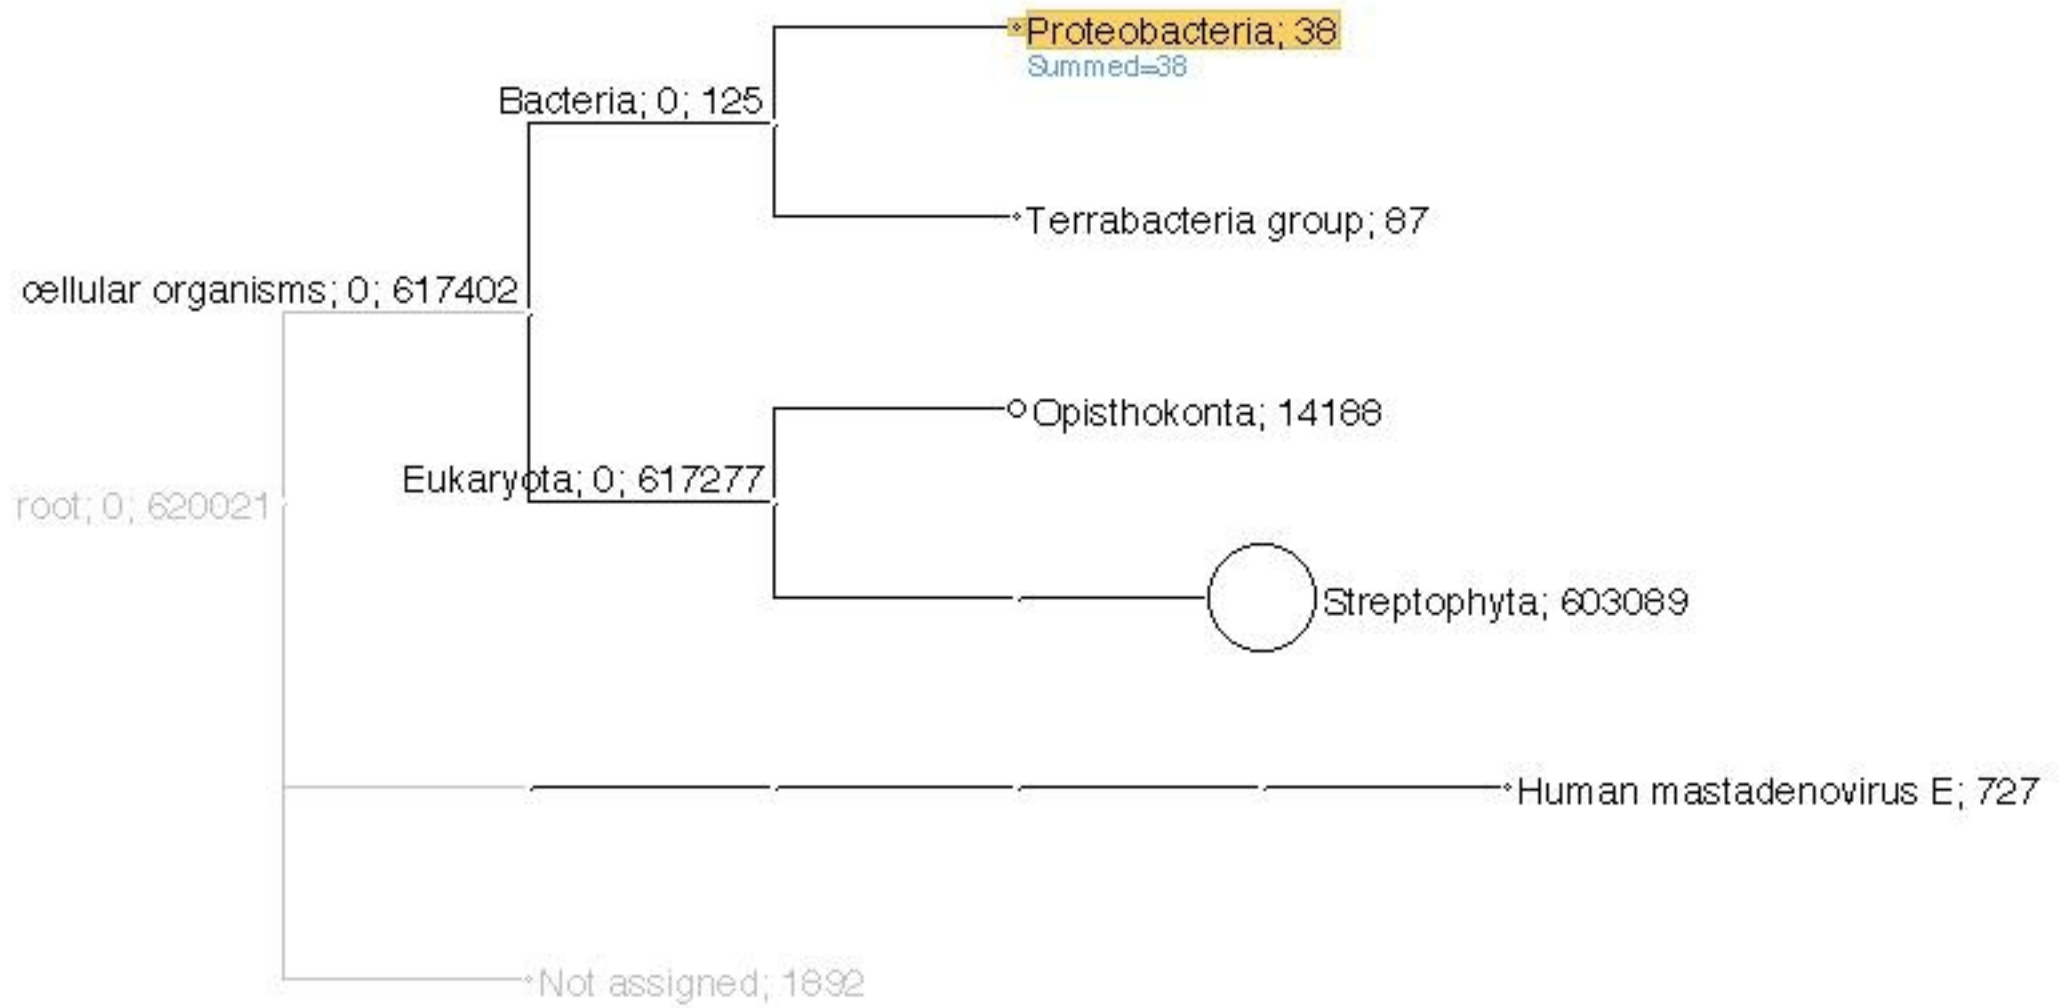

Figure 2

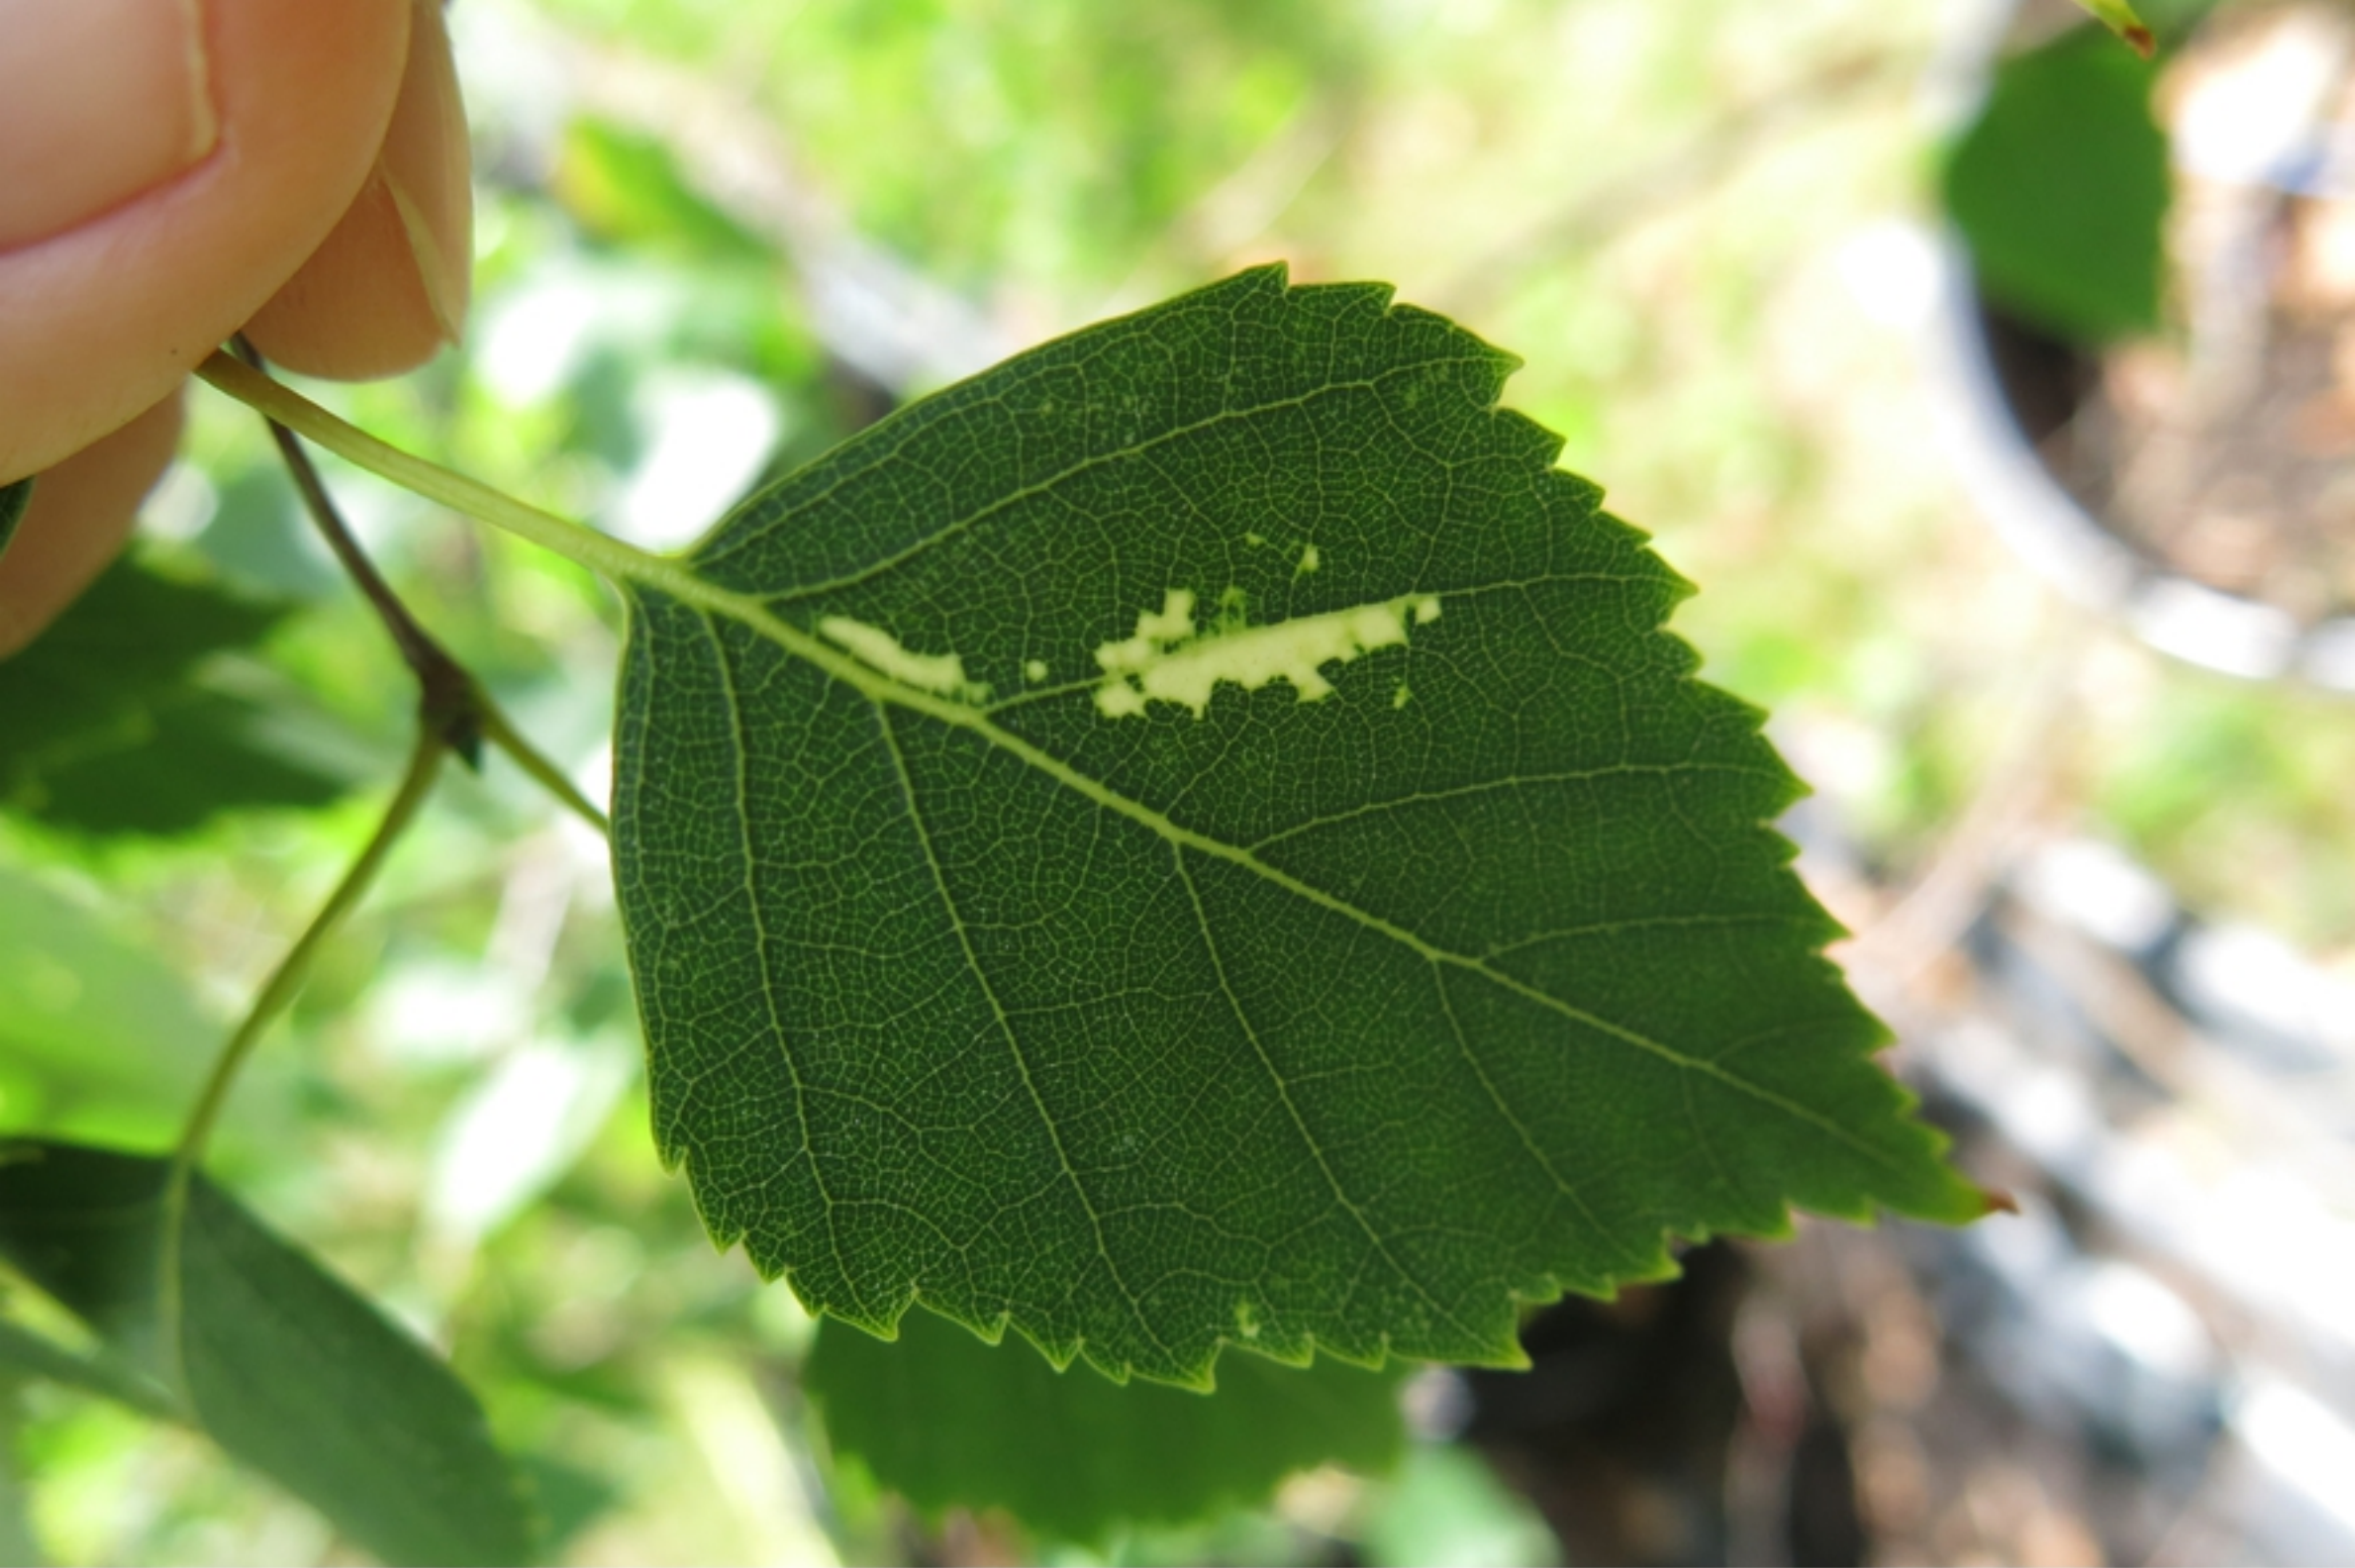

Figure 3

bioRxiv preprint doi: <https://doi.org/10.1101/730092>; this version posted August 19, 2019. The copyright holder for this preprint (which was not certified by peer review) is the author/funder, who has granted bioRxiv a license to display the preprint in perpetuity. It is made available under aCC-BY 4.0 International license.

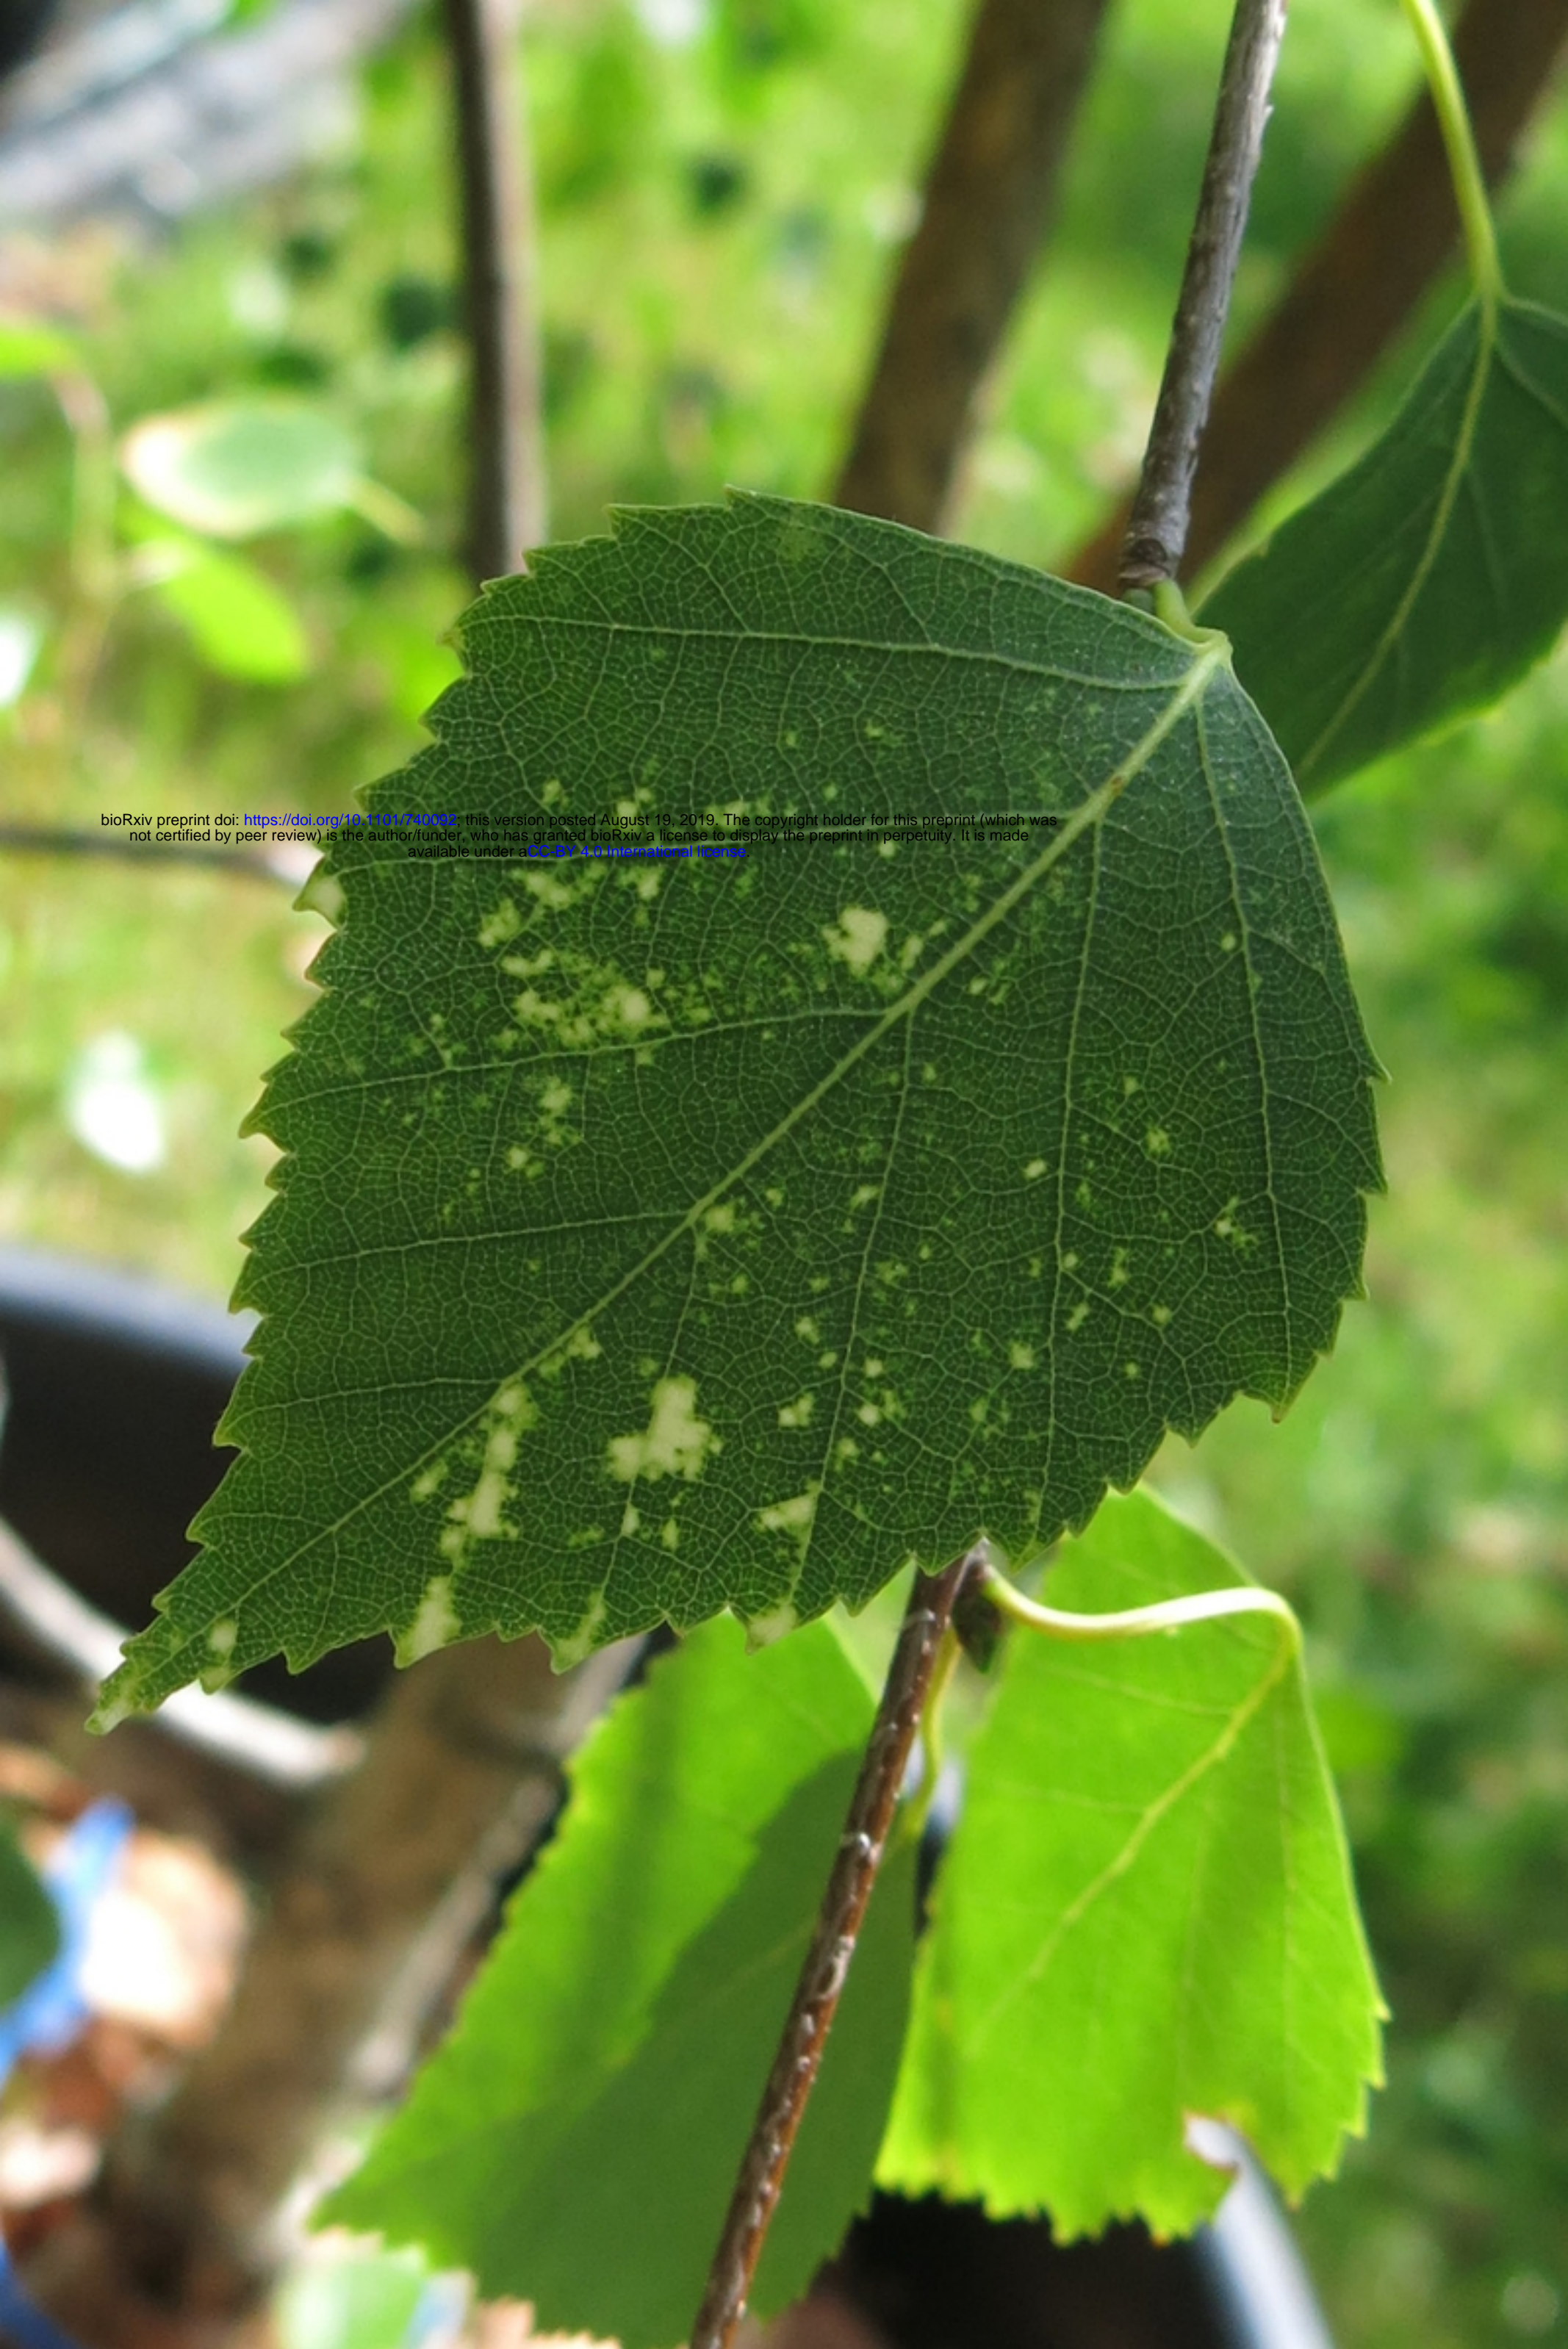

Figure 3

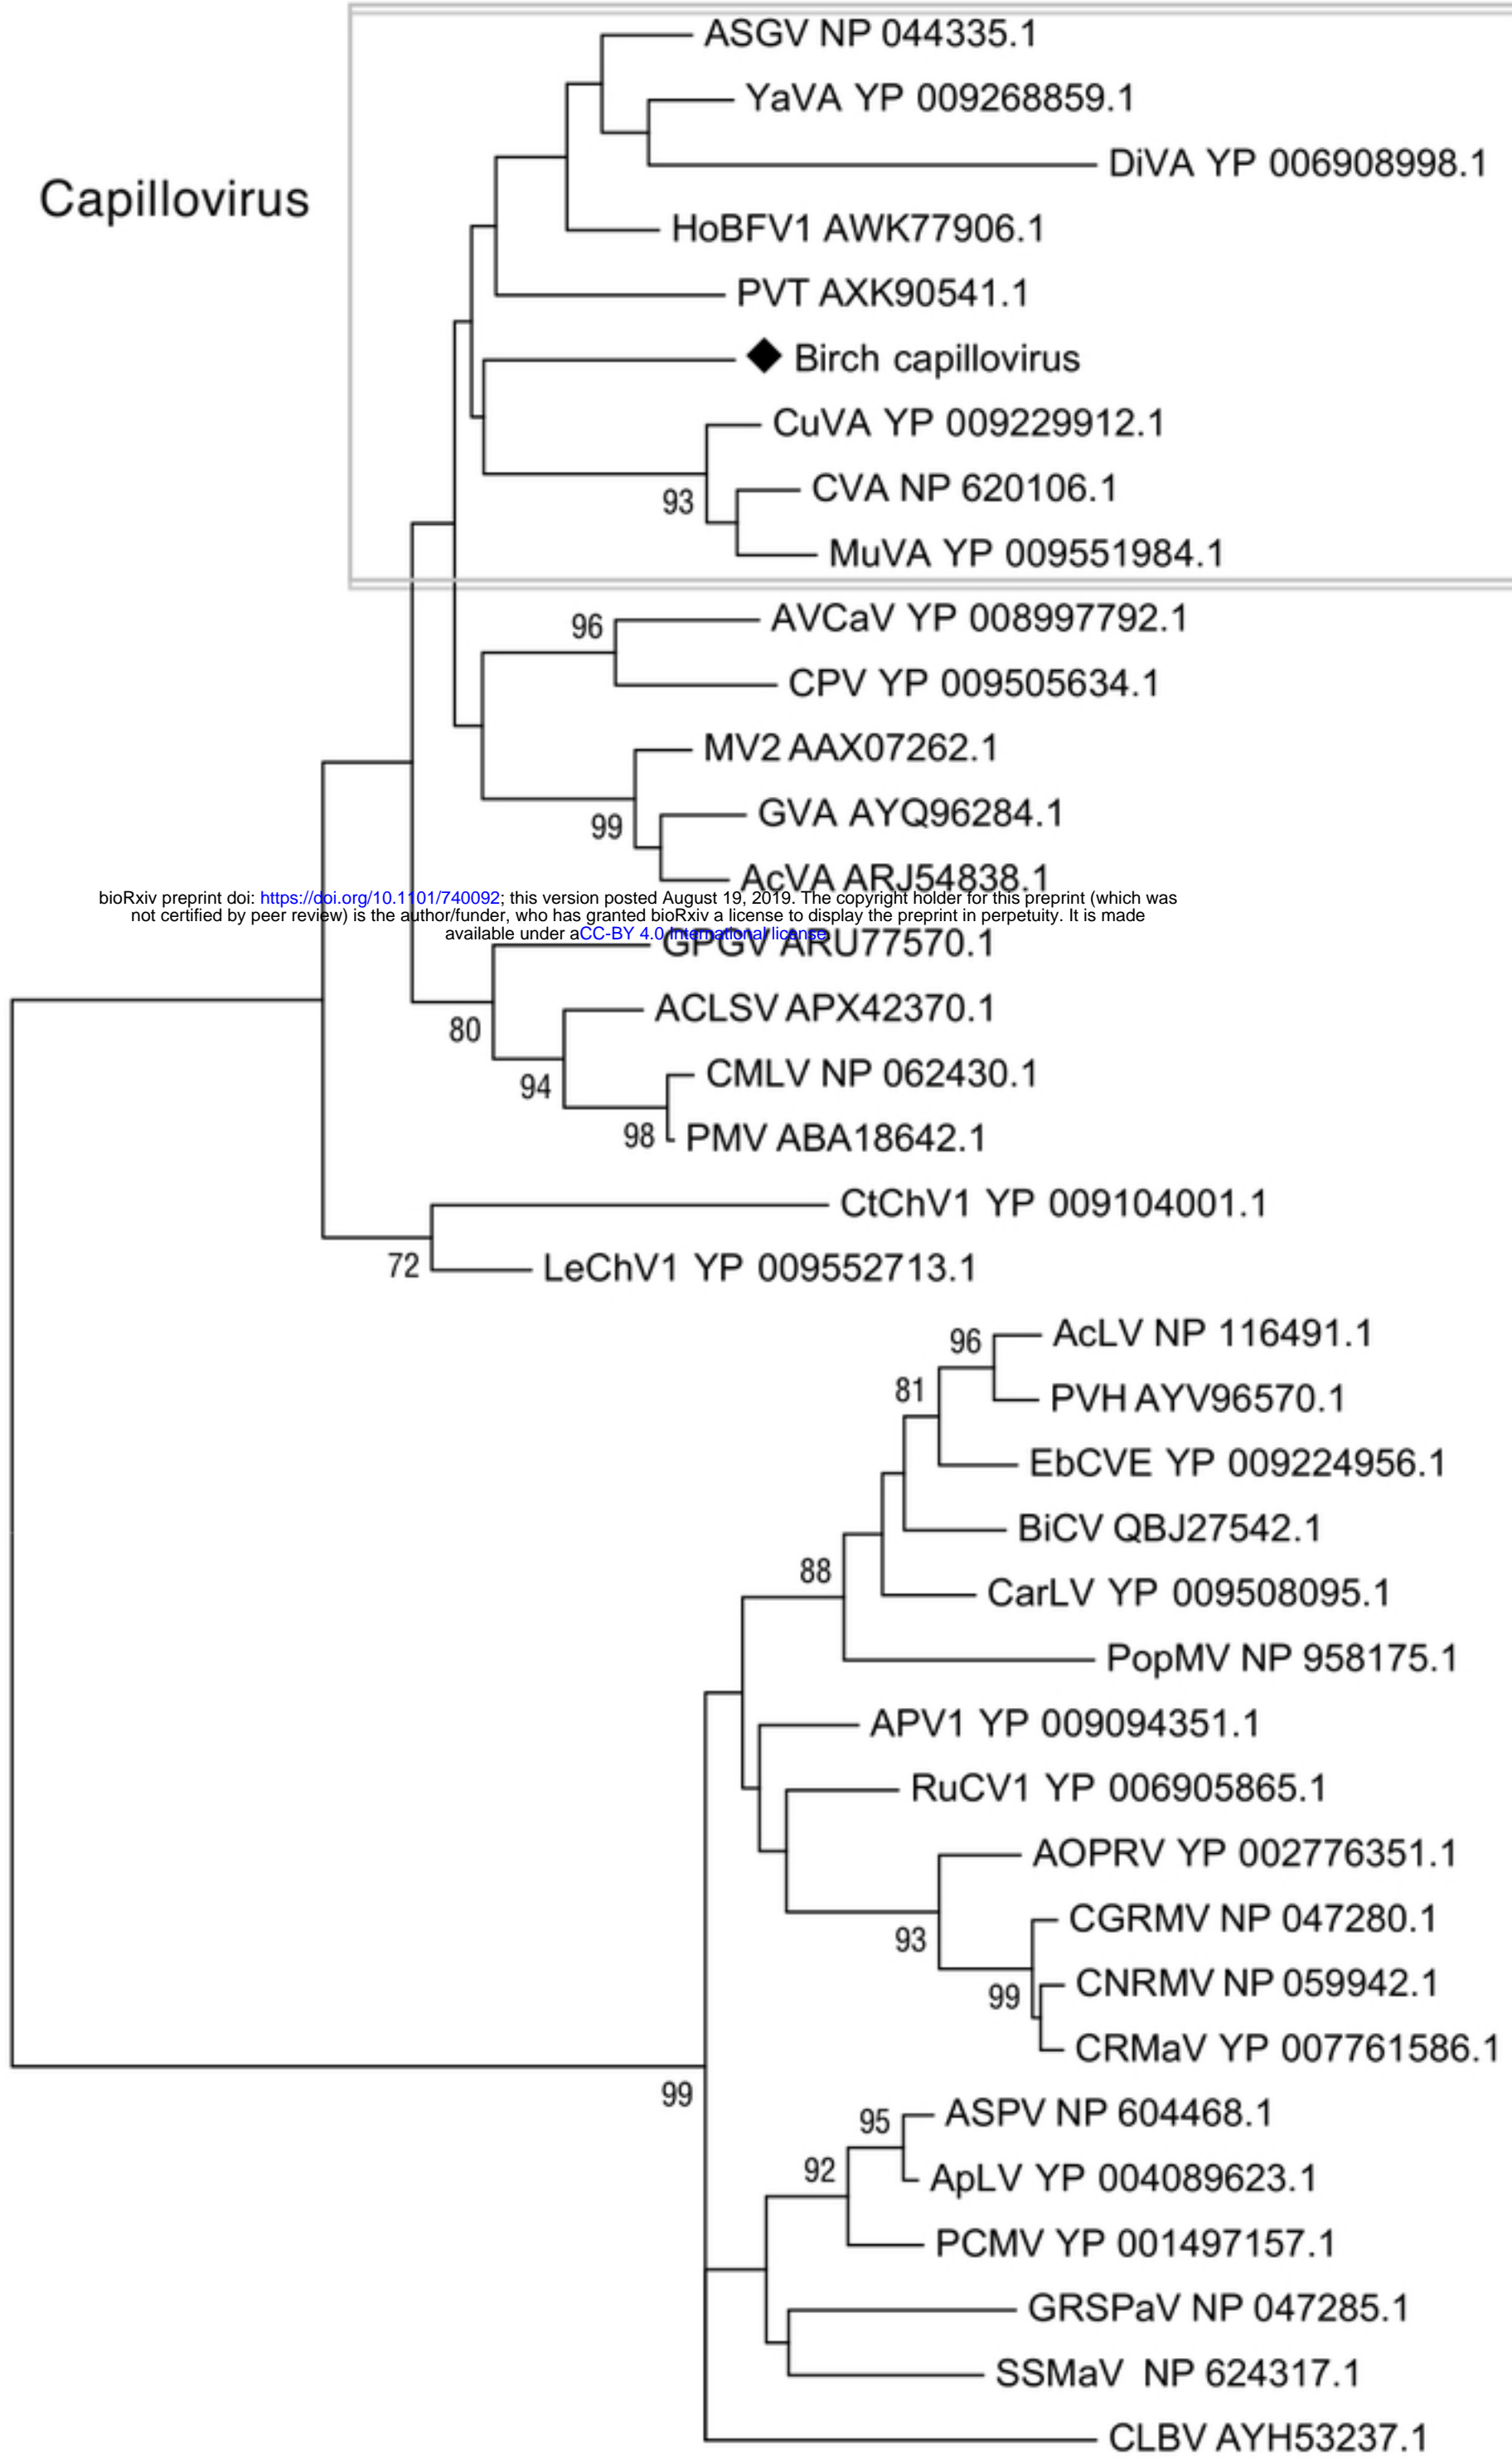

bioRxiv preprint doi: <https://doi.org/10.1101/740092>; this version posted August 19, 2019. The copyright holder for this preprint (which was not certified by peer review) is the author/funder, who has granted bioRxiv a license to display the preprint in perpetuity. It is made available under aCC-BY 4.0 International license.

0.5

Figure 4

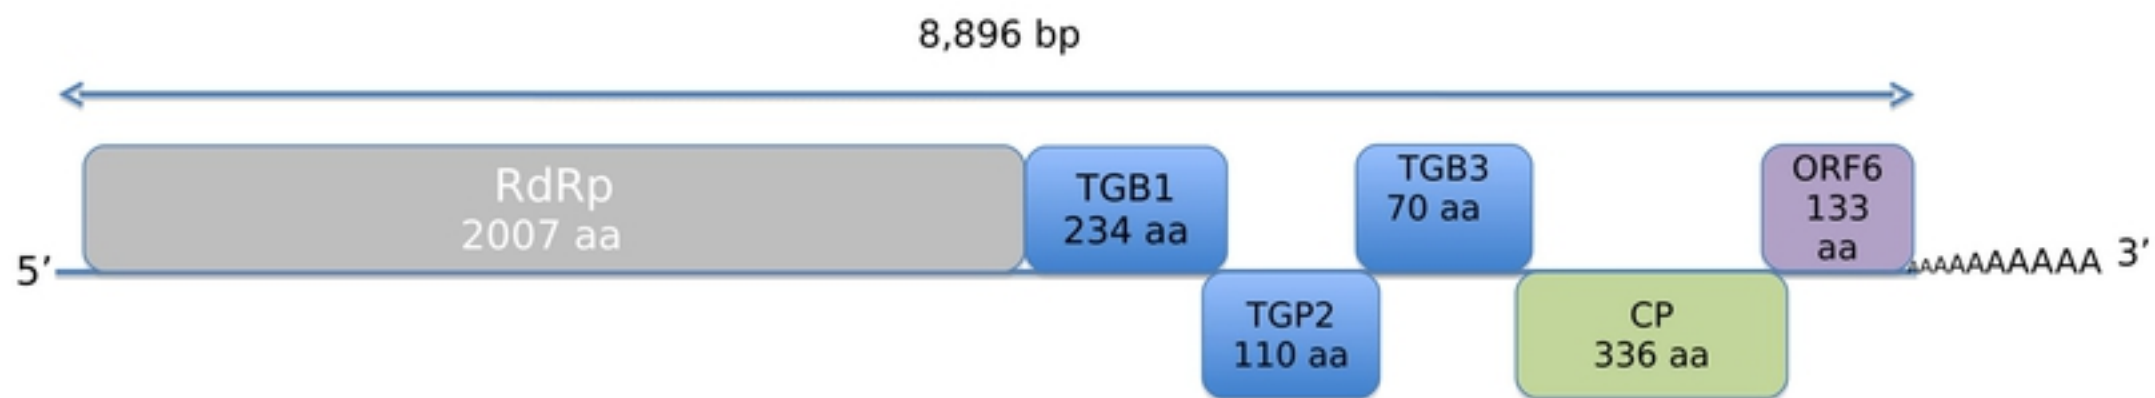

Figure 5



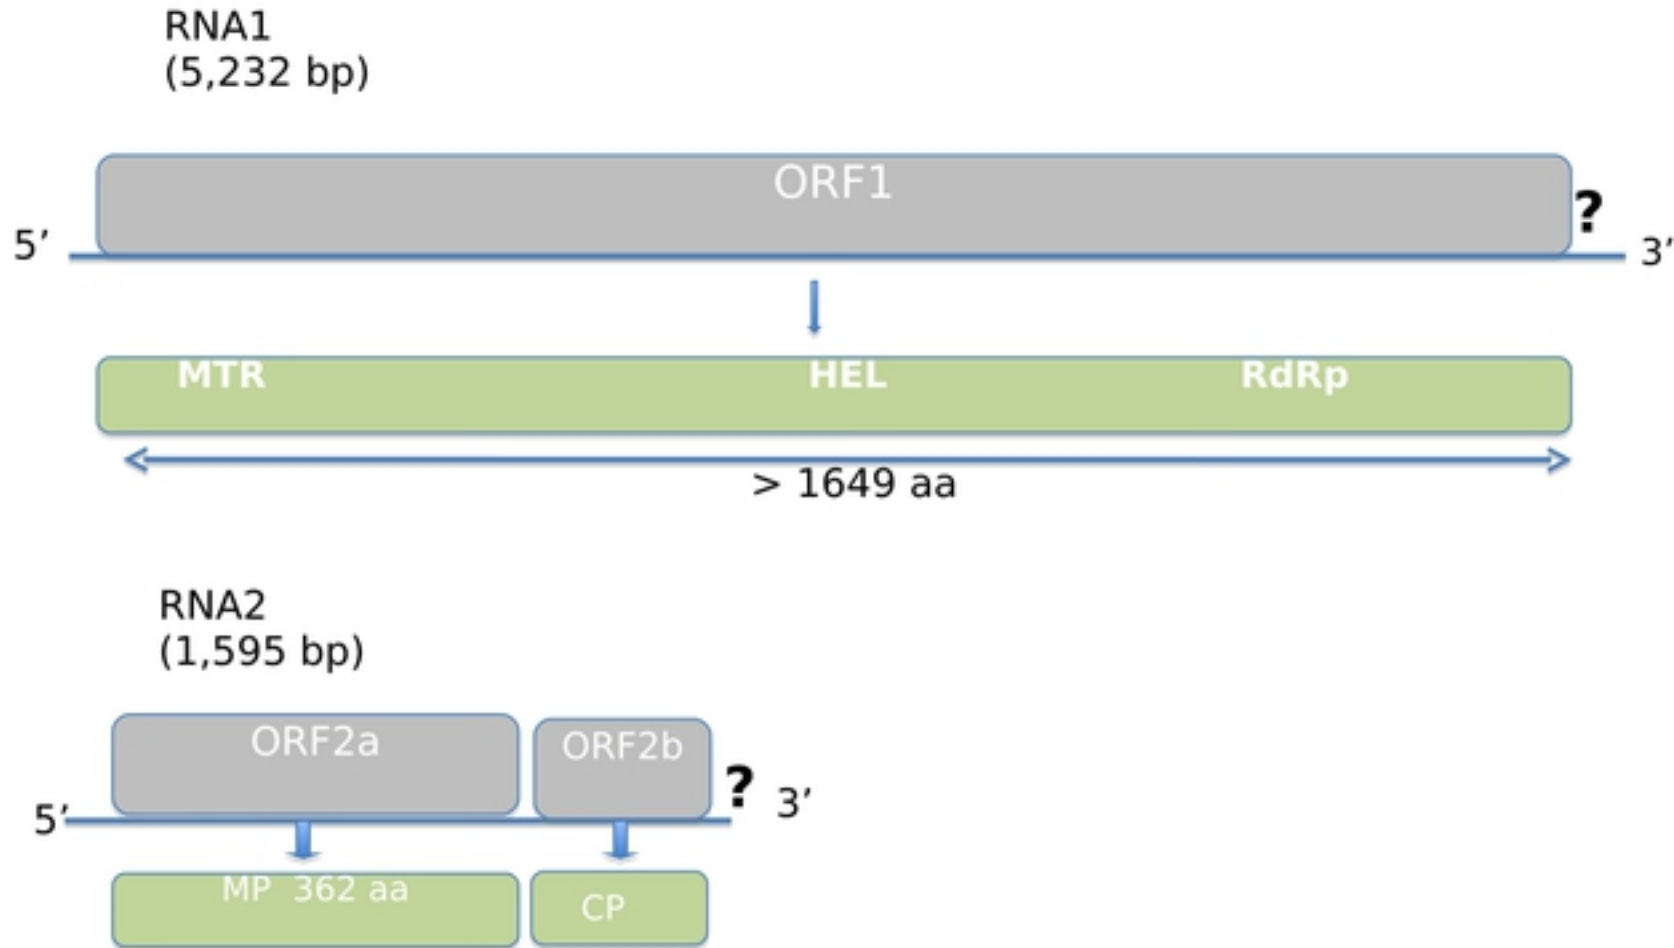

Figure 5

bioRxiv preprint doi: <https://doi.org/10.1101/740092>; this version posted August 19, 2019. The copyright holder for this preprint (which was not certified by peer review) is the author/funder, who has granted bioRxiv a license to display the preprint in perpetuity. It is made available under aCC-BY 4.0 International license.

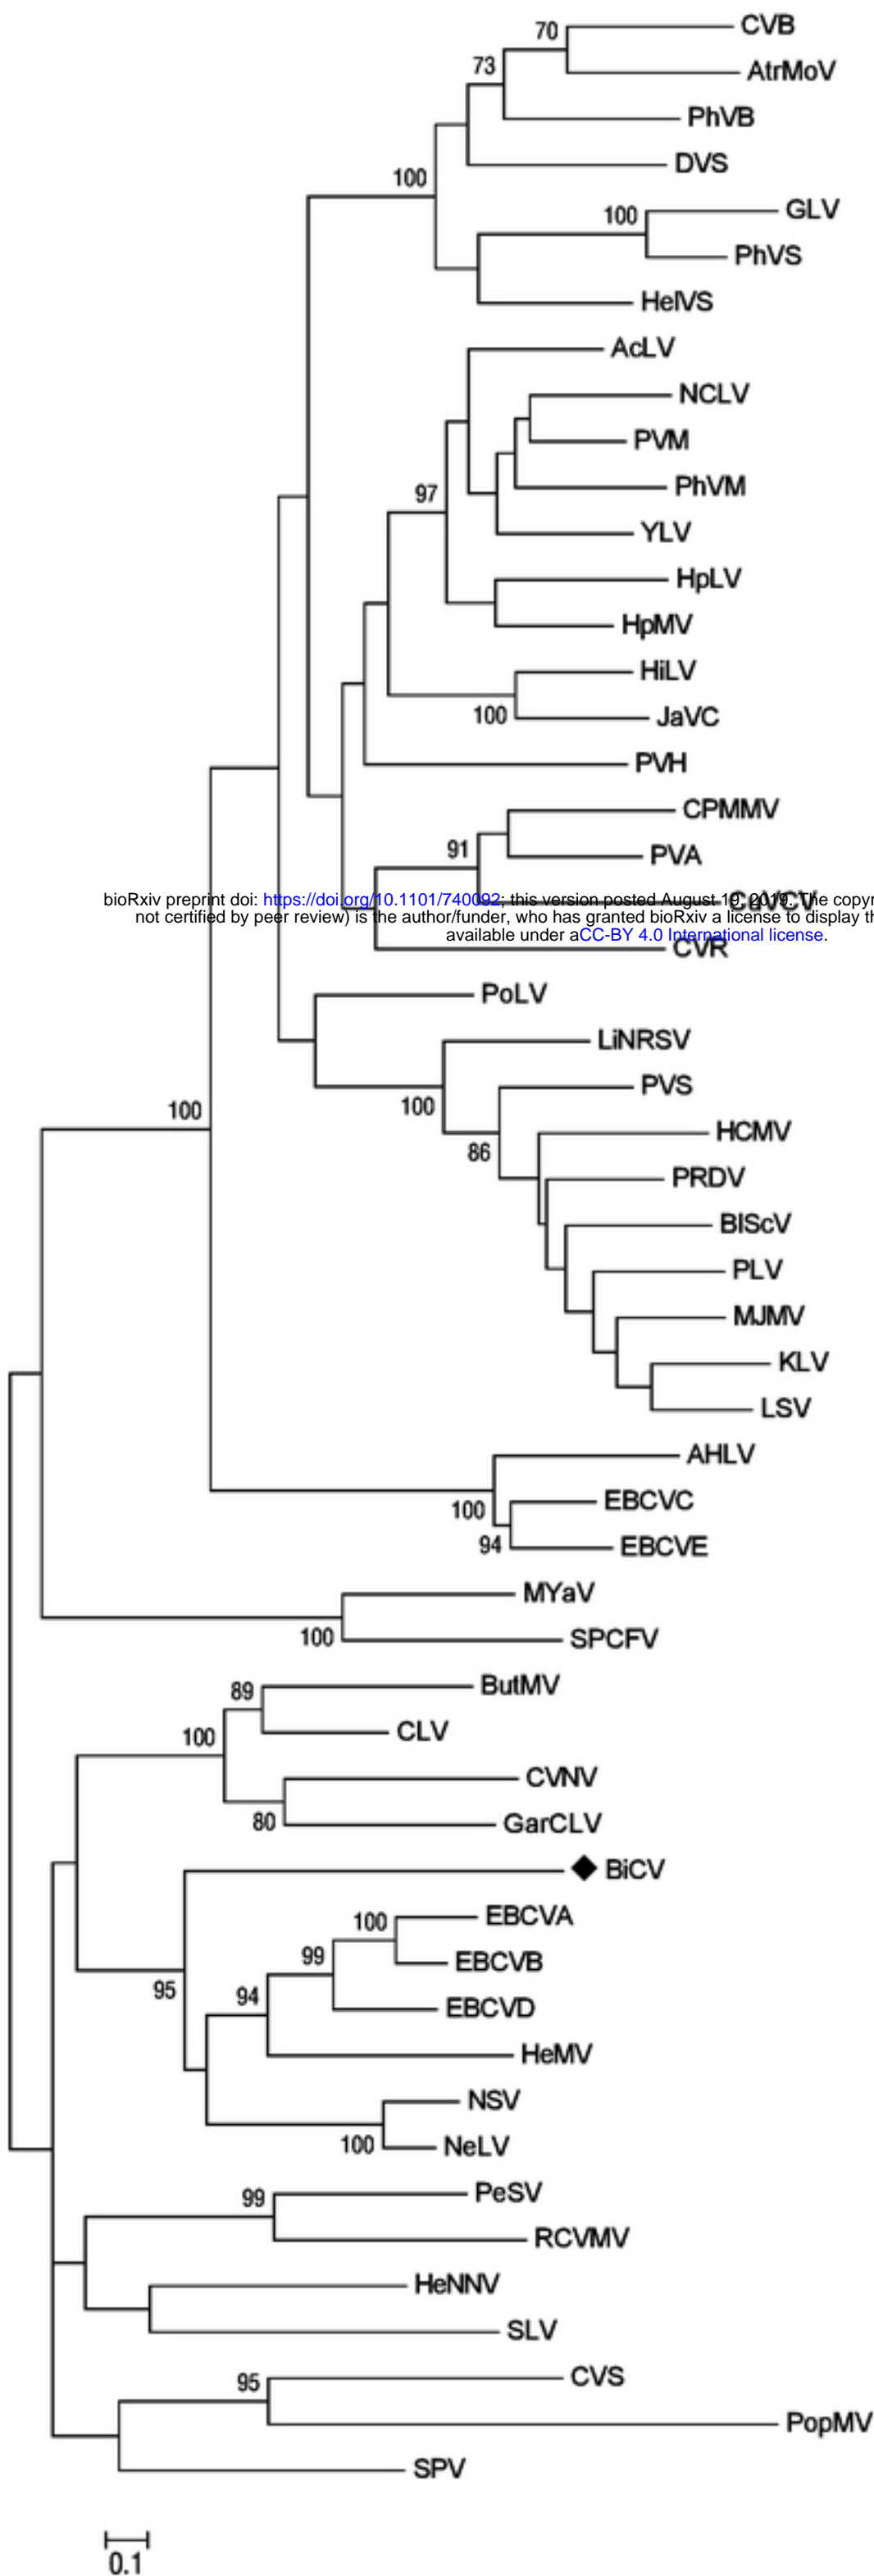

Figure 6

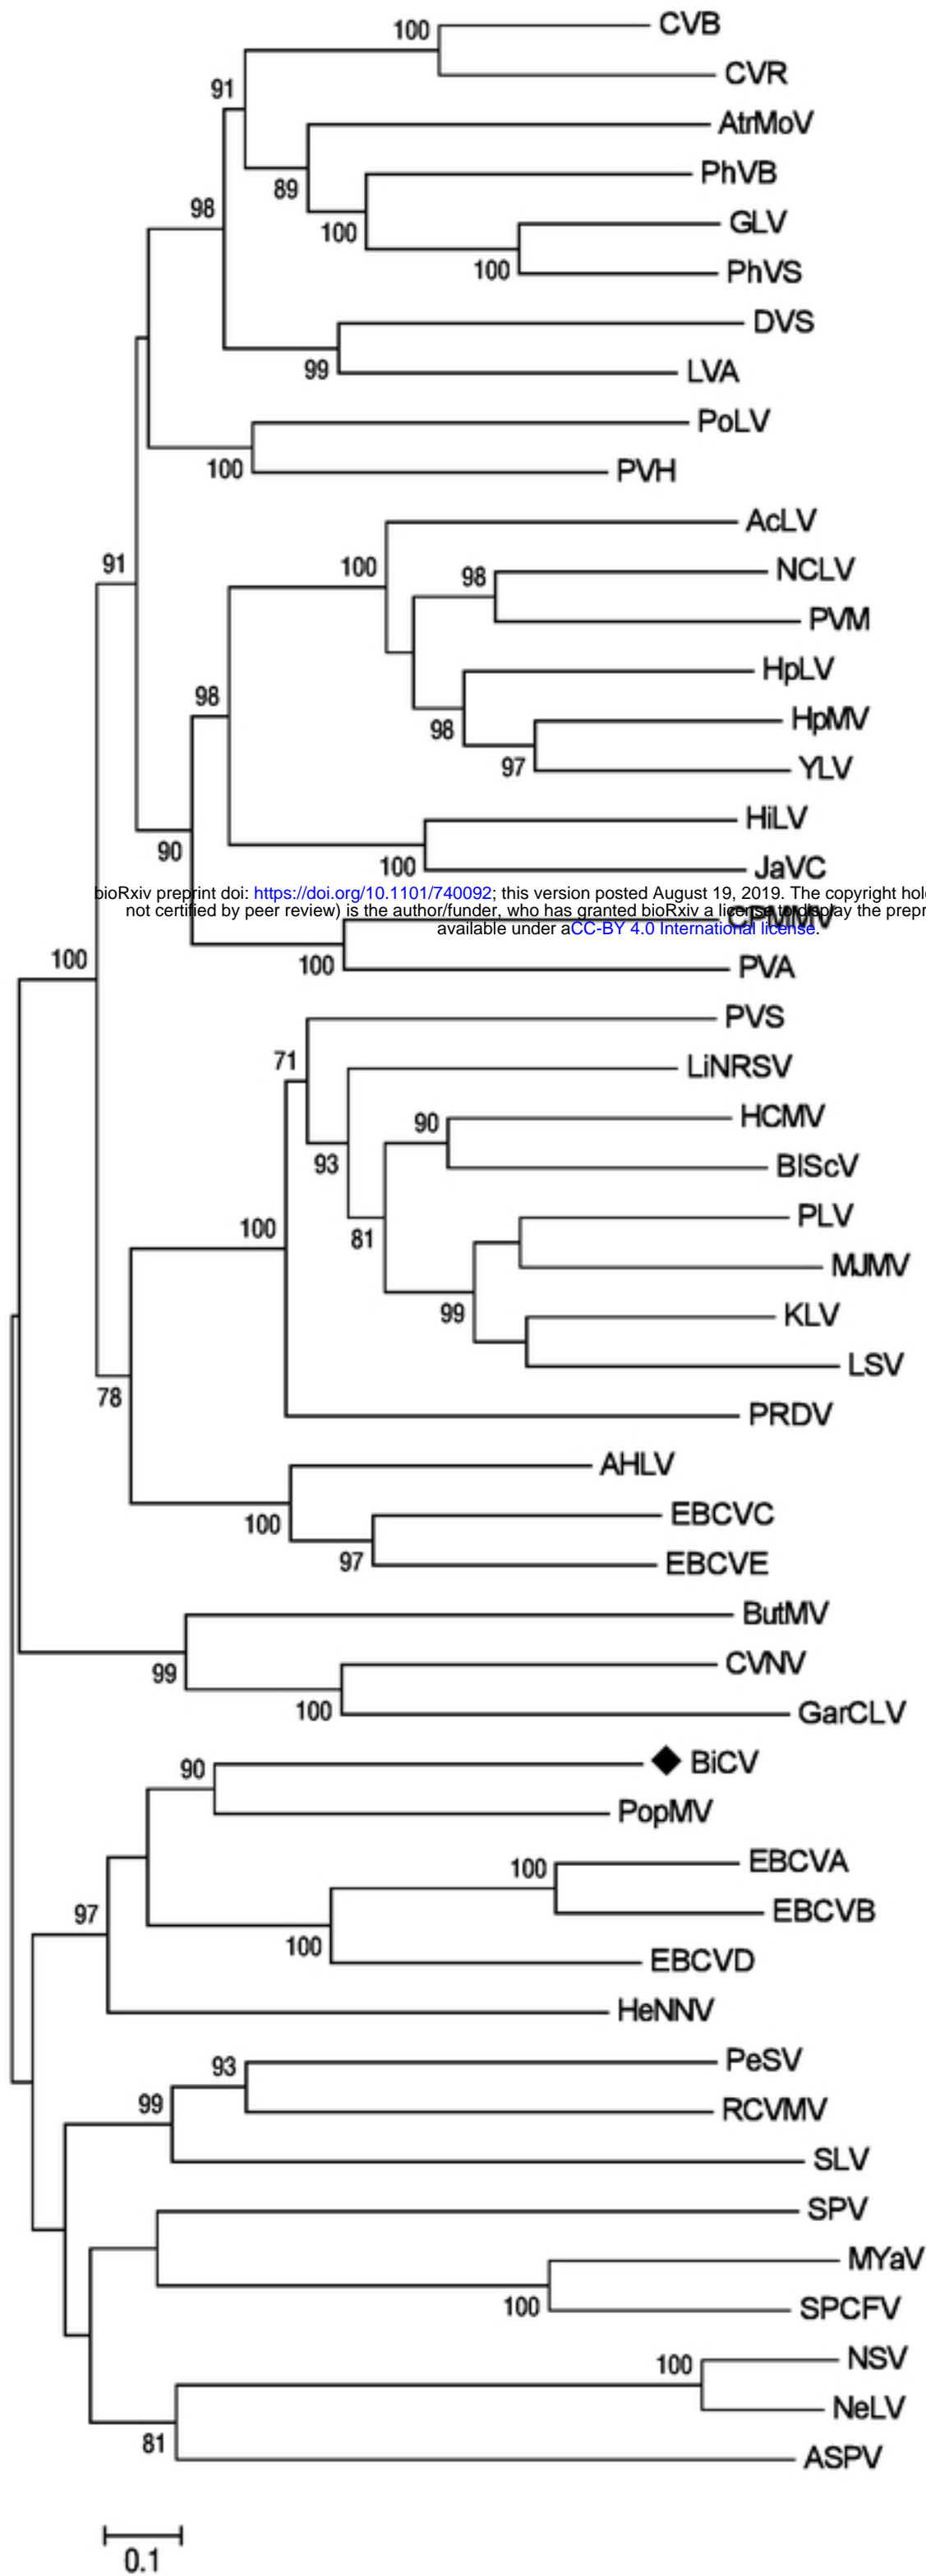

Figure 6
